# Supplementary material
Source: MDPI journal article supplement (https://www.mdpi.com/2073-4352/13/1/25)
Supplement: s1 [file s1]

# *Electronic Supplementary Information*

## *Development of hydrogen-bonded dimer-type photoluminescent liquid crystals of fluorinated tolanecarboxylic acid*

Shigeyuki Yamada <sup>1,\*</sup>, Mitsuki Kataoka <sup>1</sup>, Keigo Yoshida <sup>1</sup>, Masakazu Nagata <sup>2,3</sup>,  
Tomohiro Agou <sup>2</sup>, Hiroki Fukumoto <sup>2</sup>, ant Tsutomu Konno <sup>1</sup>

<sup>1</sup> Faculty of Molecular Chemistry and Engineering, Kyoto Institute of Technology, Matsugasaki, Sakyo-ku, Kyoto 606-8585, Japan

<sup>2</sup> Department of Quantum Beam Science, Graduate School of Science and Engineering, Ibaraki University, 4-12-1 Nakanarusawa, Hitachi, Ibaraki 316-8511, Japan

<sup>3</sup> Present address: Organic Materials Chemistry Group, Sagami Chemical Research Institute, Hayakawa 2743-1, Ayase, Kanagawa 252-1193, Japan

\* Correspondence: syamada@kit.ac.jp (S.Y.); Tel: +81-75-724-7517

### *Table of Contents*

|                                                |              |      |
|------------------------------------------------|--------------|------|
| NMR spectrum                                   | ••••••••••   | S-2  |
| Crystallographic analysis                      | ••••••••••   | S-18 |
| Phase transition behavior                      |              |      |
| DSC thermograms                                | ••••••••••   | S-19 |
| VT-PXRD patterns                               | ••••••~••••• | S-22 |
| Photophysical behavior                         |              |      |
| CH <sub>2</sub> Cl <sub>2</sub> solution phase | ••••••~••••• | S-23 |
| Solvatochromic PL behavior                     | ••••••~••••• | S-24 |
| Cry phase                                      | ••••••~••••• | S-25 |
| Nematic LC phase                               | ••••••~••••• | S-26 |
| Quantum chemical calculation                   | ••••••~••••• | S-27 |
| Cartesian coordinate                           | ••••••~••••• | S-29 |

## NMR spectrum

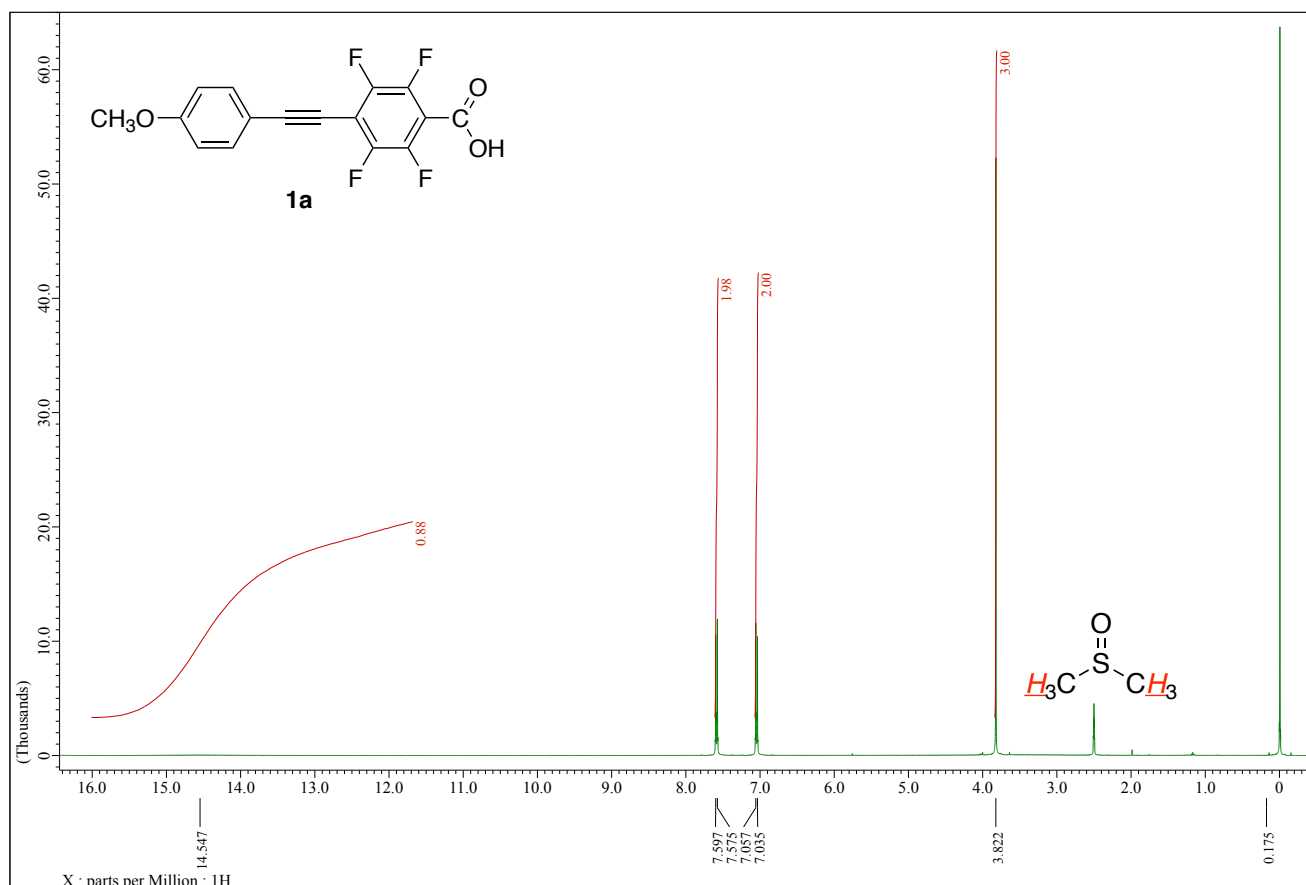

**Figure S1.** <sup>1</sup>H NMR spectrum of **1a** (DMSO-*d*<sub>6</sub>, 400 MHz).

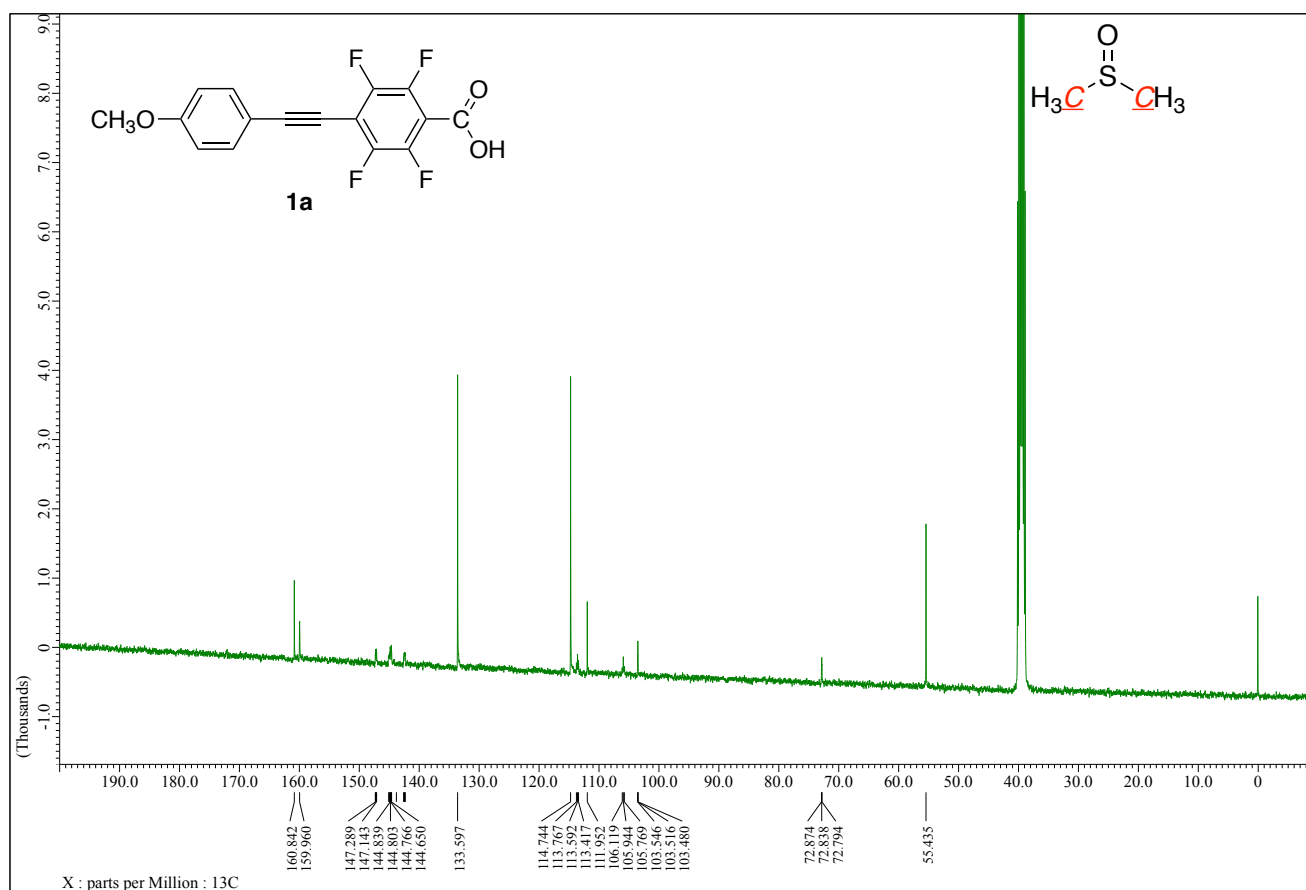

**Figure S2.** <sup>13</sup>C NMR spectrum of **1a** (DMSO-*d*<sub>6</sub>, 100 MHz).

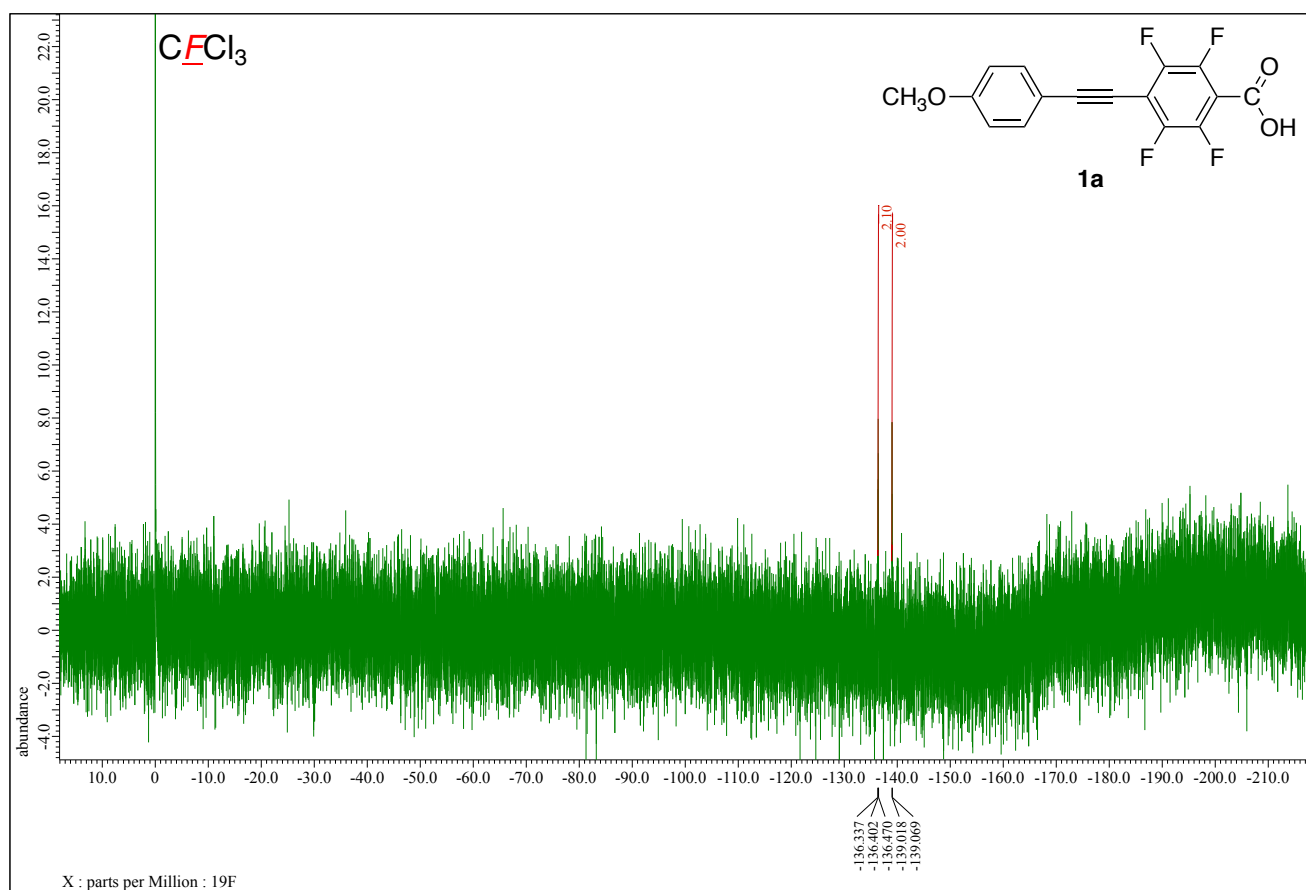

**Figure S3.**  $^{19}\text{F}$  NMR spectrum of **1a** ( $\text{DMSO-}d_6$ ,  $\text{CFCl}_3$ , 376 MHz).

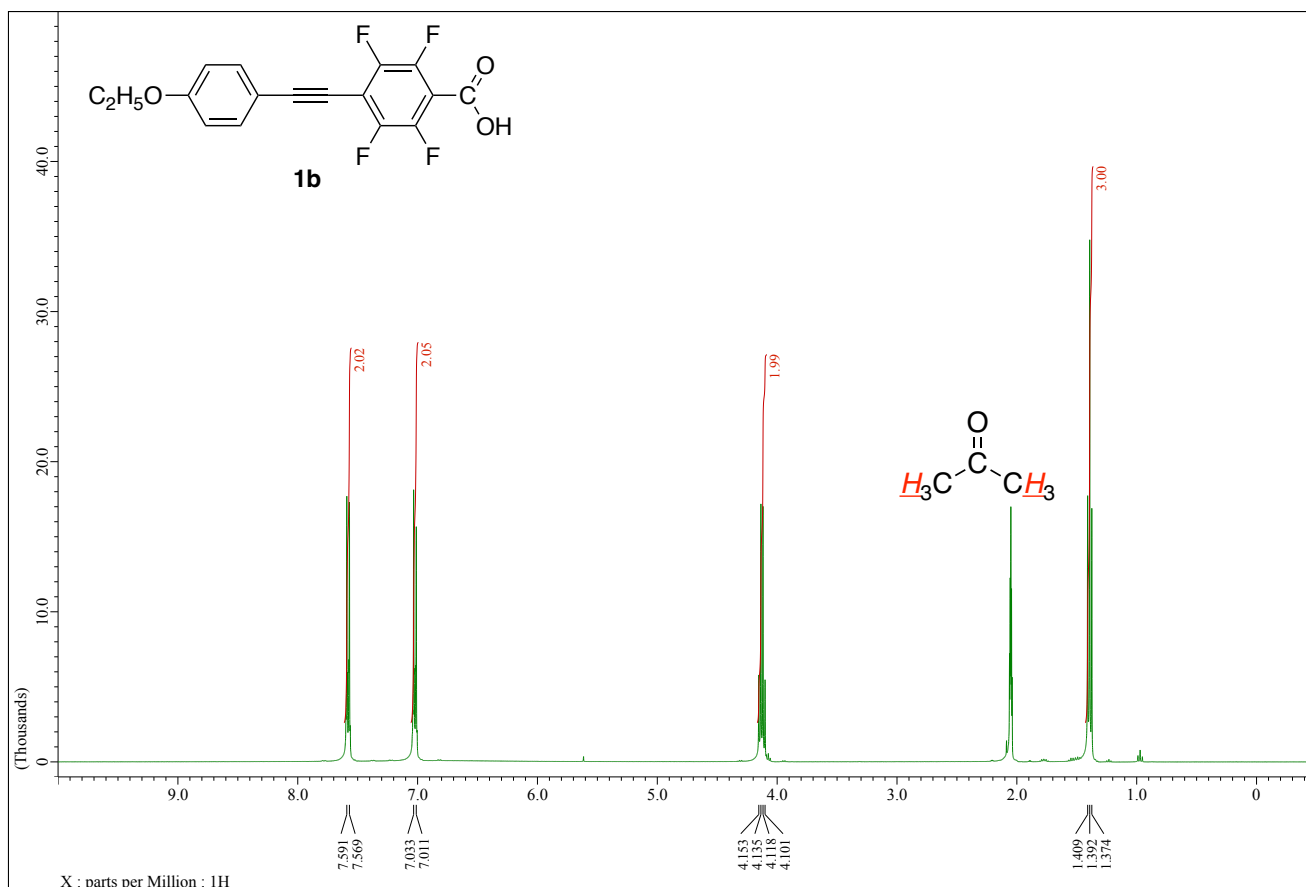

**Figure S4.** <sup>1</sup>H NMR spectrum of **1b** (acetone-*d*<sub>6</sub>, 400 MHz).

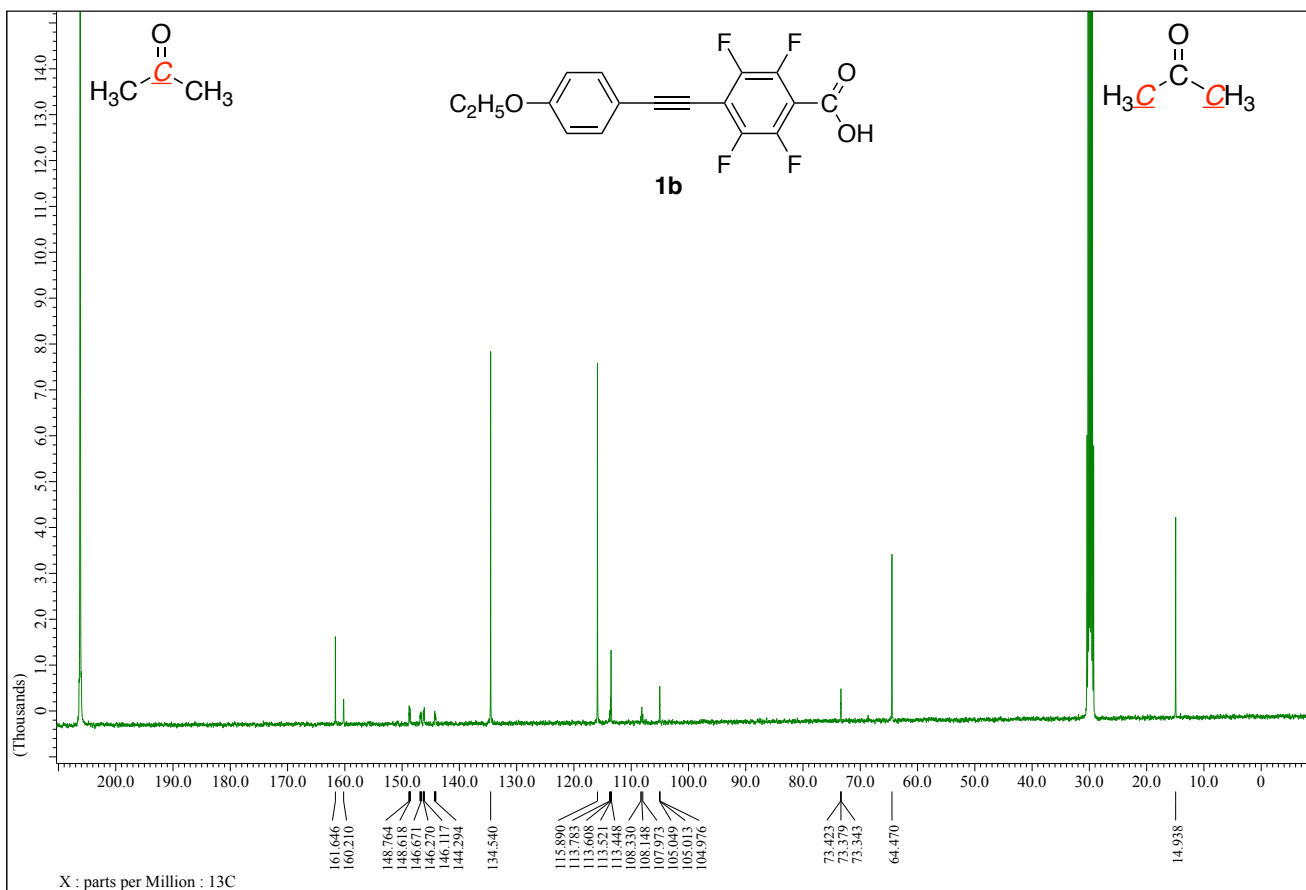

**Figure S5.** <sup>13</sup>C NMR spectrum of **1b** (acetone-*d*<sub>6</sub>, 100 MHz).



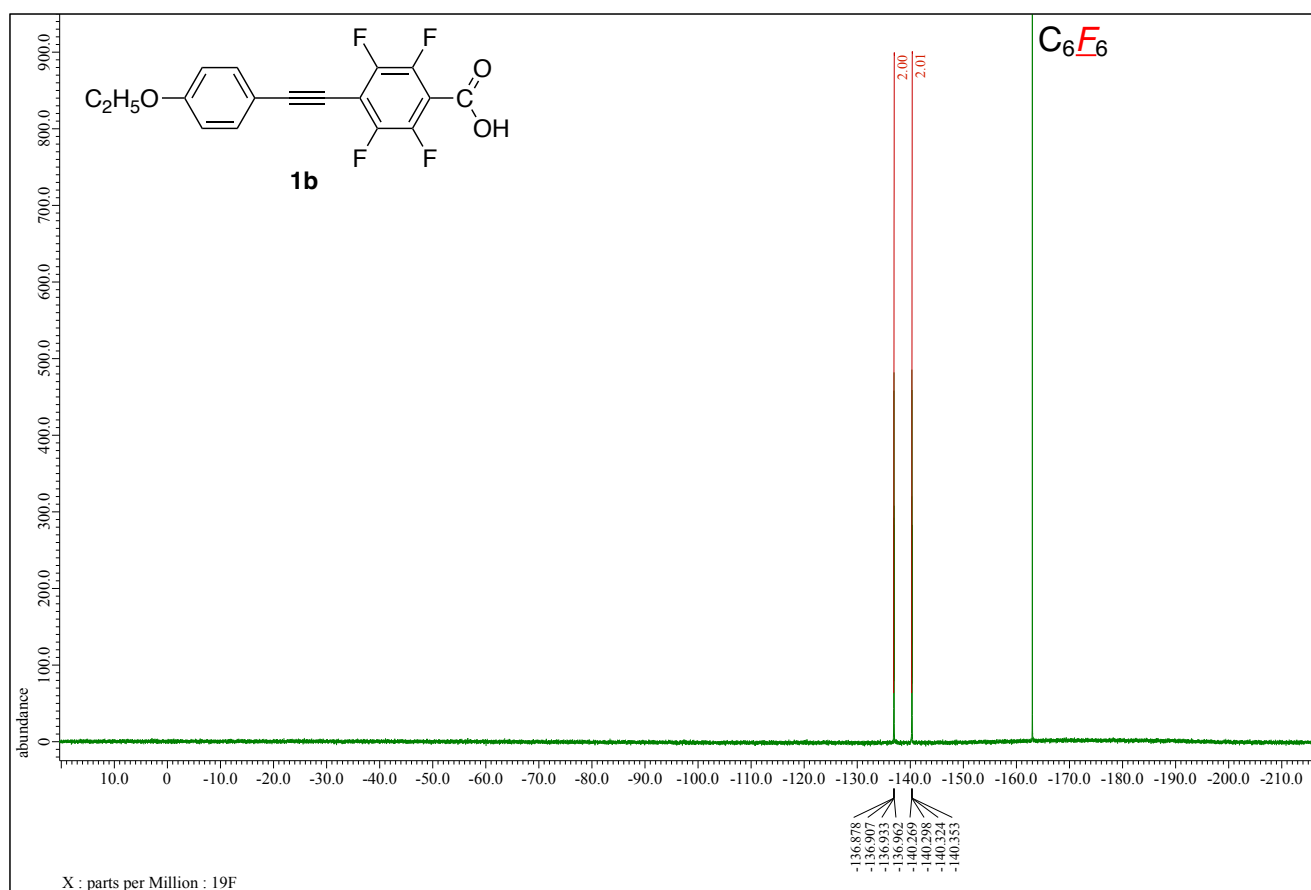

**Figure S6.**  $^{19}\text{F}$  NMR spectrum of **1b** (acetone- $d_6$ ,  $\text{C}_6\text{F}_6$ , 376 MHz).

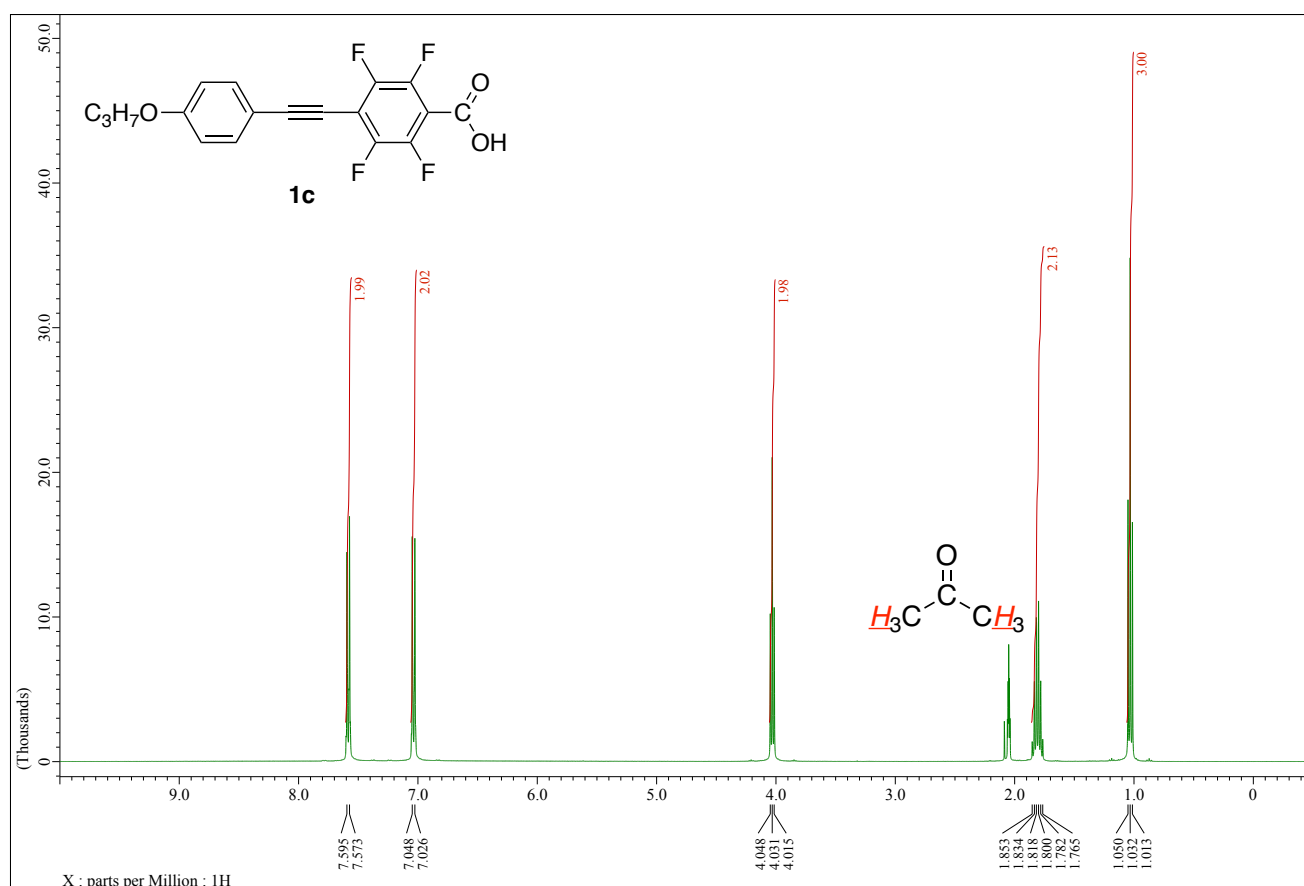

Figure S7. <sup>1</sup>H NMR spectrum of **1c** (acetone-*d*<sub>6</sub>, 400 MHz).

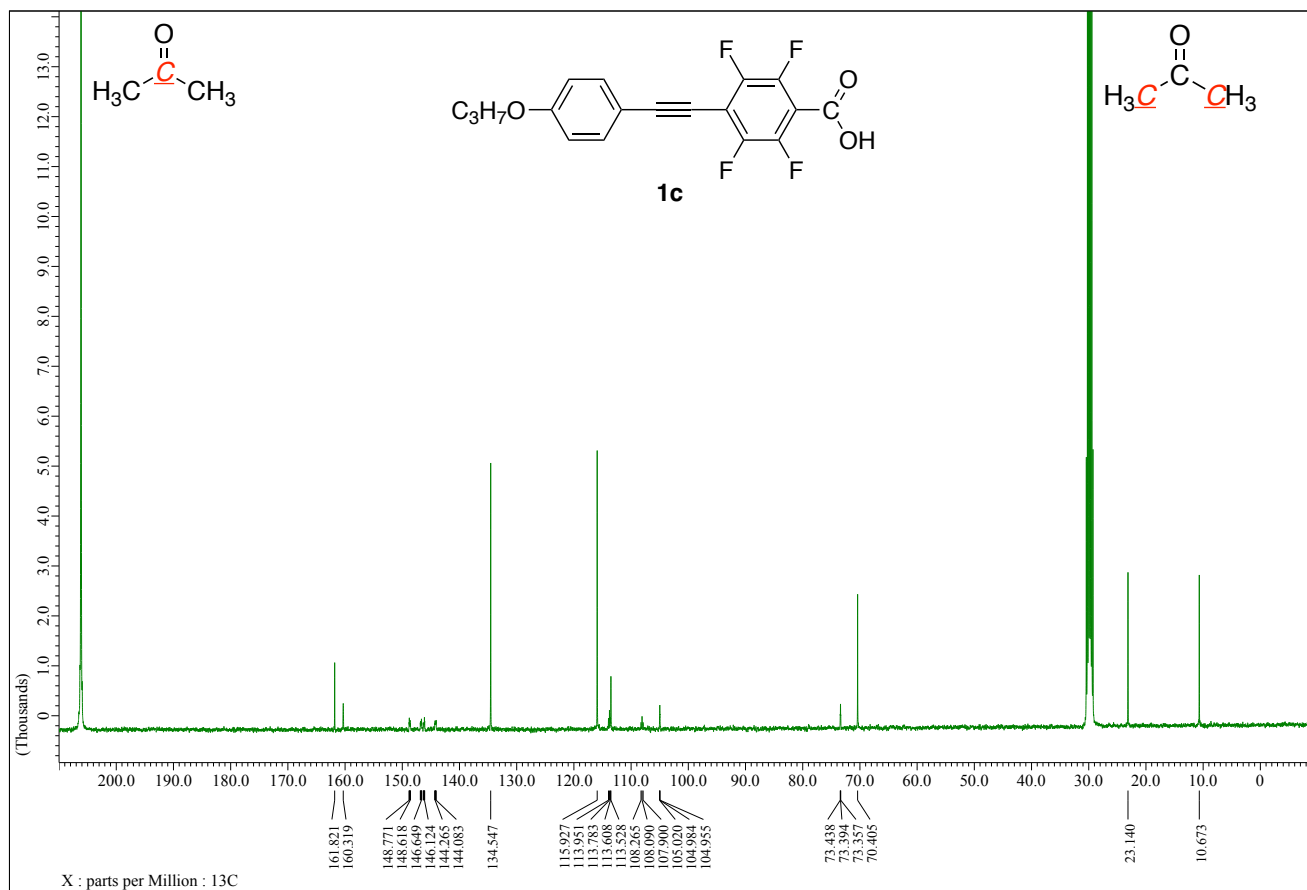

Figure S8. <sup>13</sup>C NMR spectrum of **1c** (acetone-*d*<sub>6</sub>, 100 MHz).

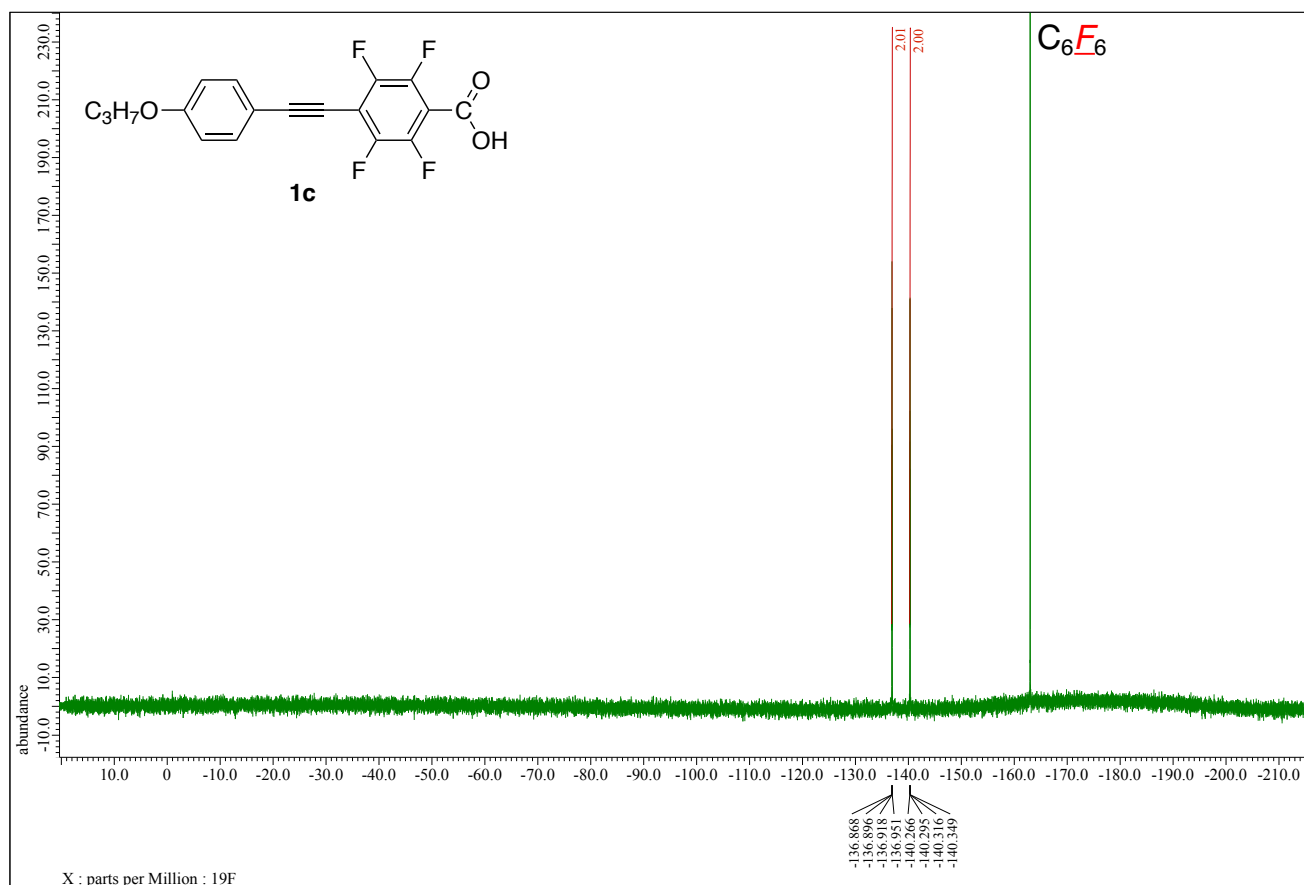

**Figure S9.** <sup>19</sup>F NMR spectrum of **1c** (acetone-*d*<sub>6</sub>, C<sub>6</sub>F<sub>6</sub>, 376 MHz).

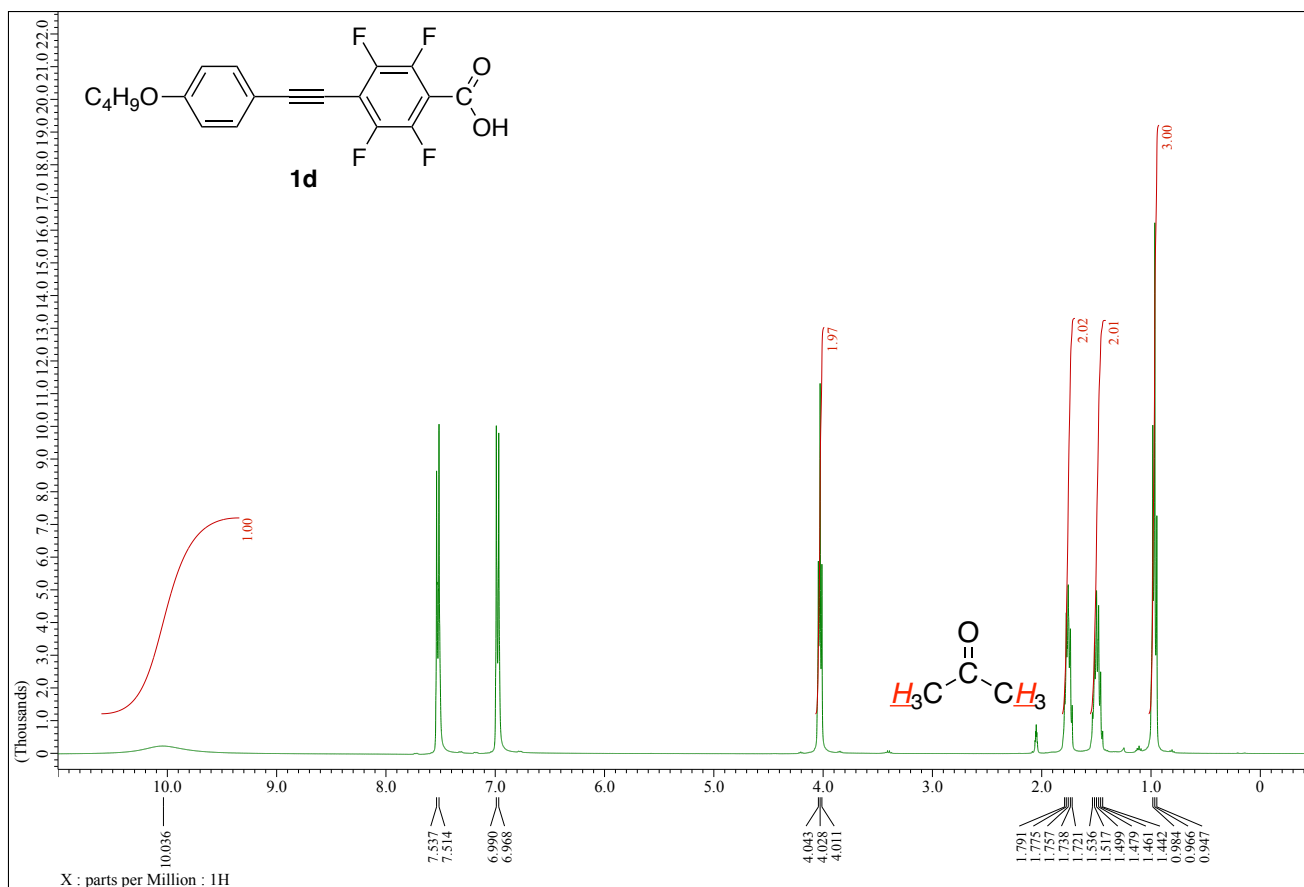

Figure S10. <sup>1</sup>H NMR spectrum of **1d** (acetone-*d*<sub>6</sub>, 400 MHz).

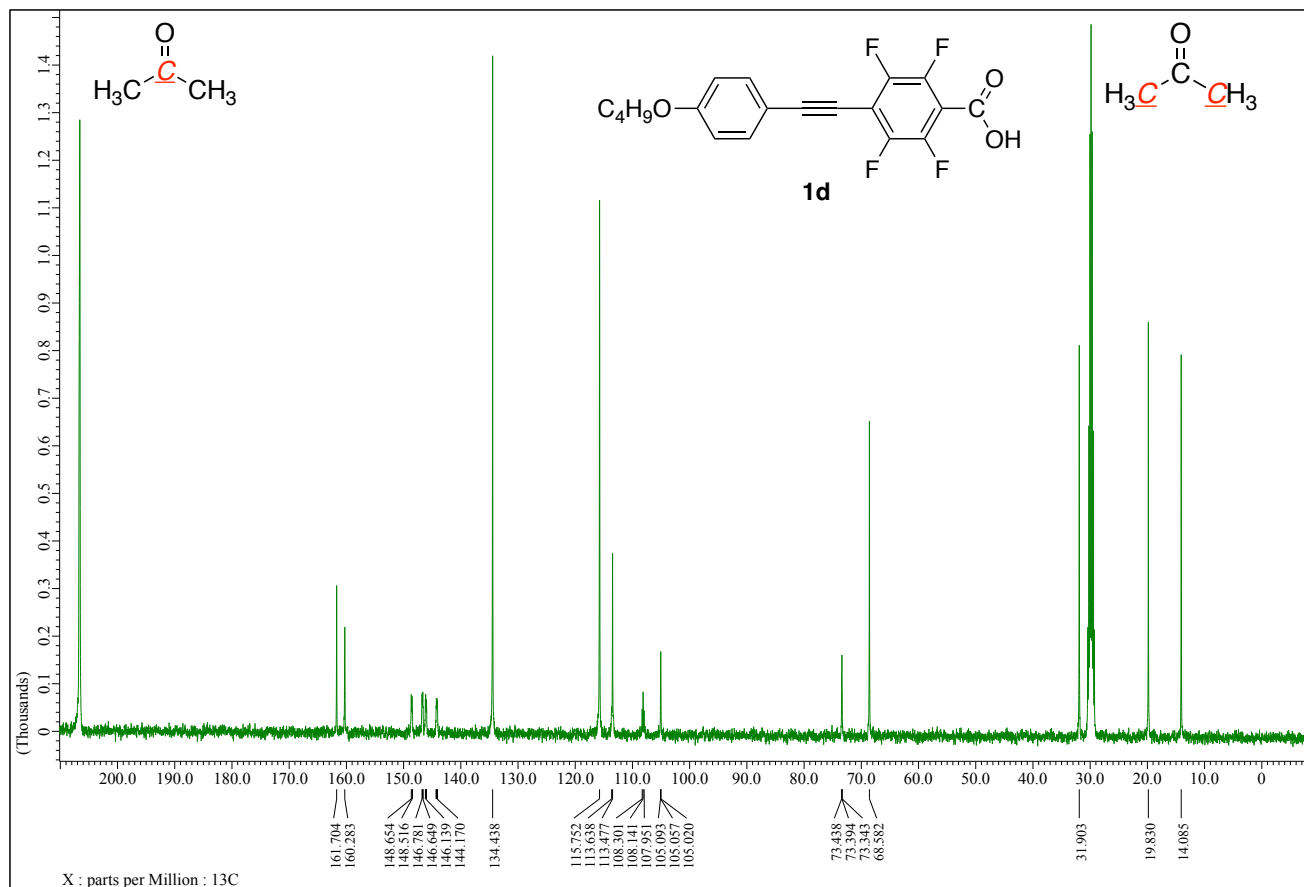

Figure S11. <sup>13</sup>C NMR spectrum of **1d** (acetone-*d*<sub>6</sub>, 100 MHz).

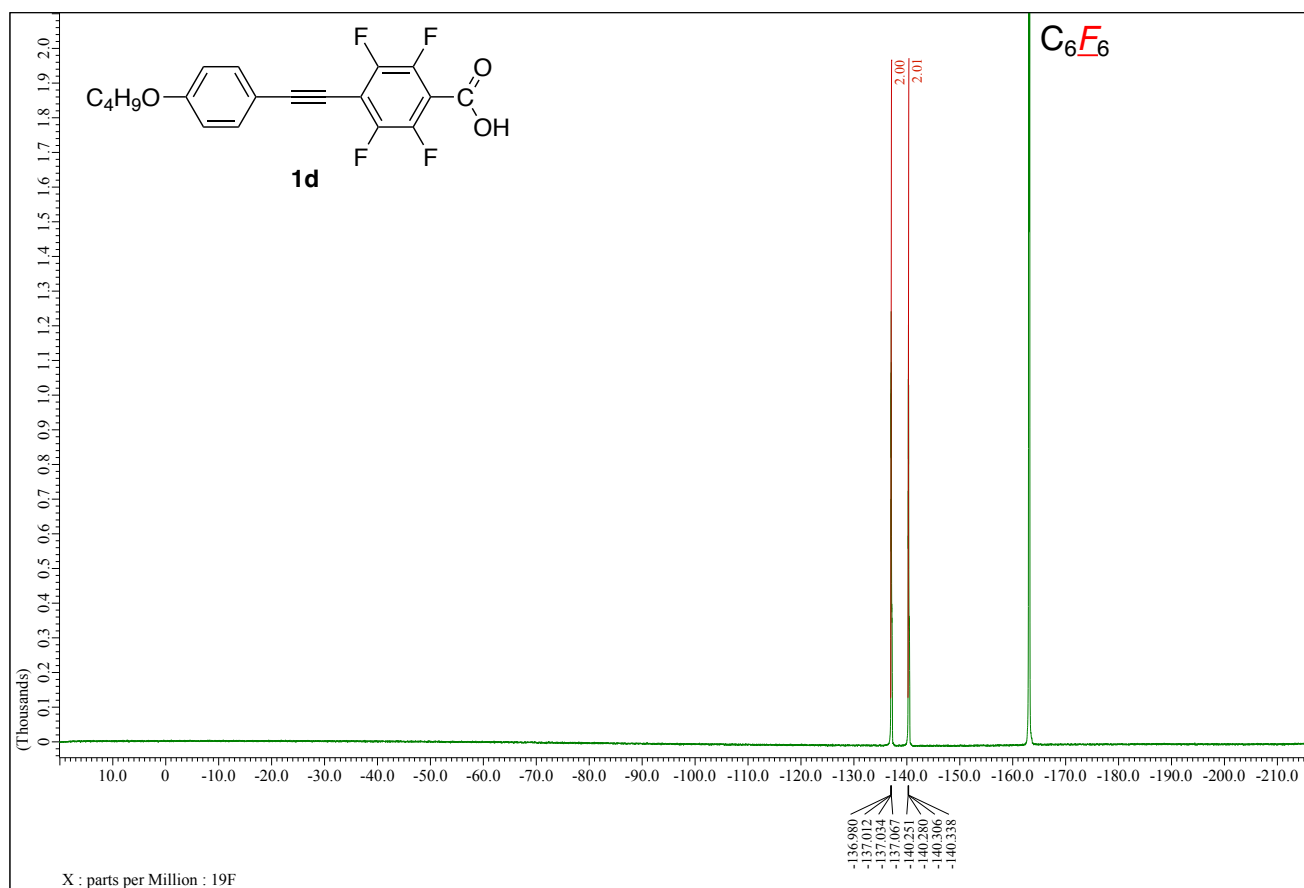

**Figure S12.**  $^{19}F$  NMR spectrum of **1d** (acetone- $d_6$ ,  $C_6F_6$ , 376 MHz).

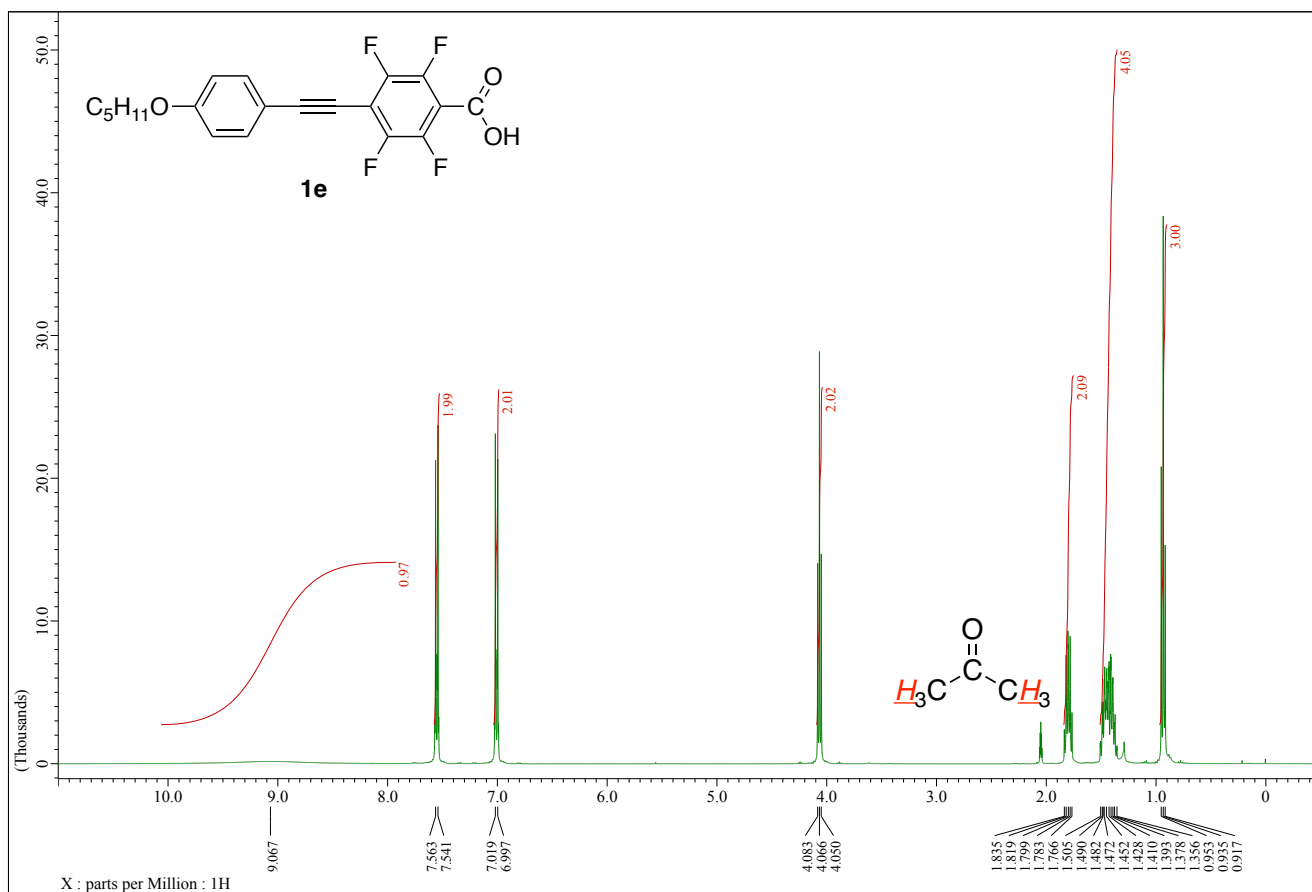

**Figure S13.** <sup>1</sup>H NMR spectrum of **1e** (acetone-*d*<sub>6</sub>, 400 MHz).

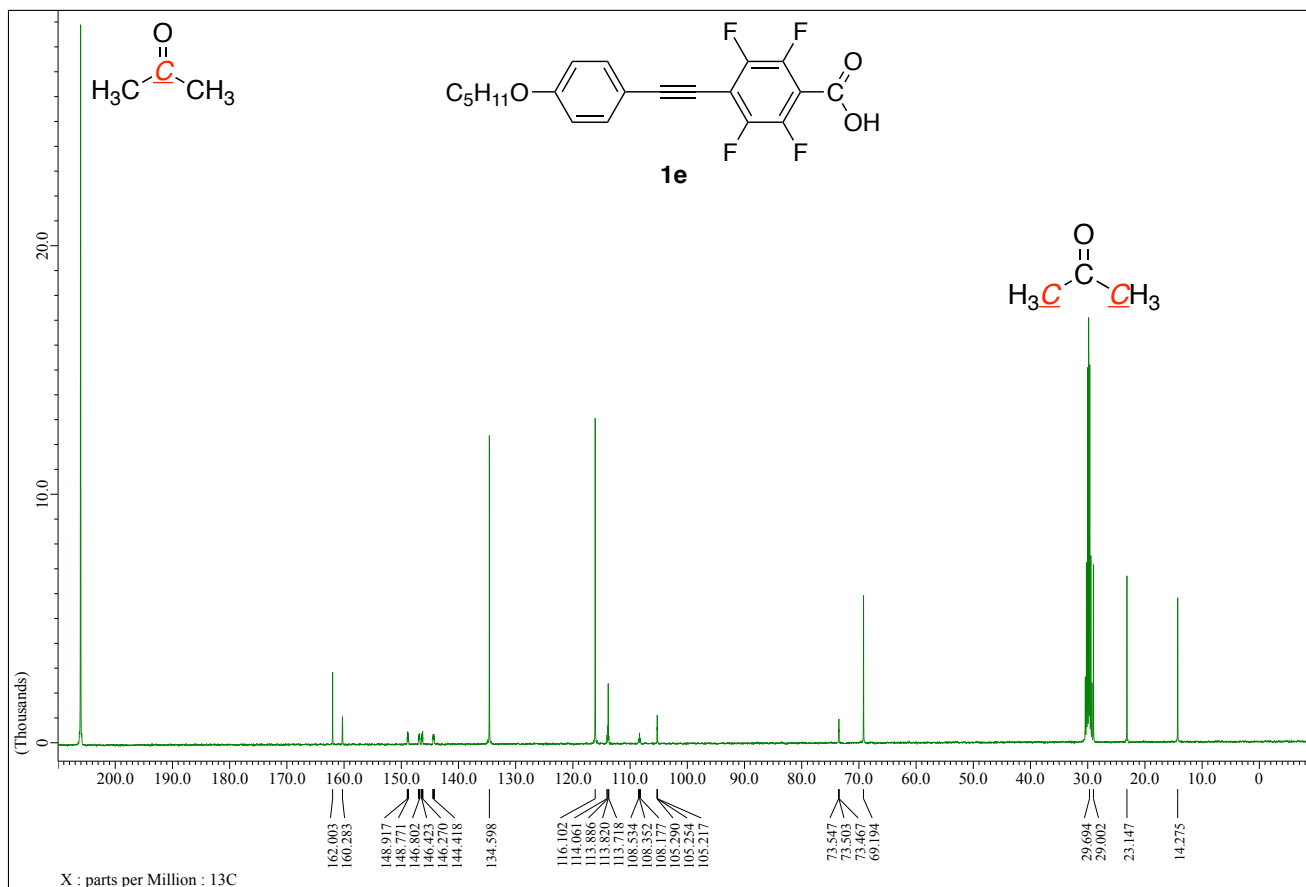

**Figure S14.** <sup>13</sup>C NMR spectrum of **1e** (acetone-*d*<sub>6</sub>, 100 MHz).

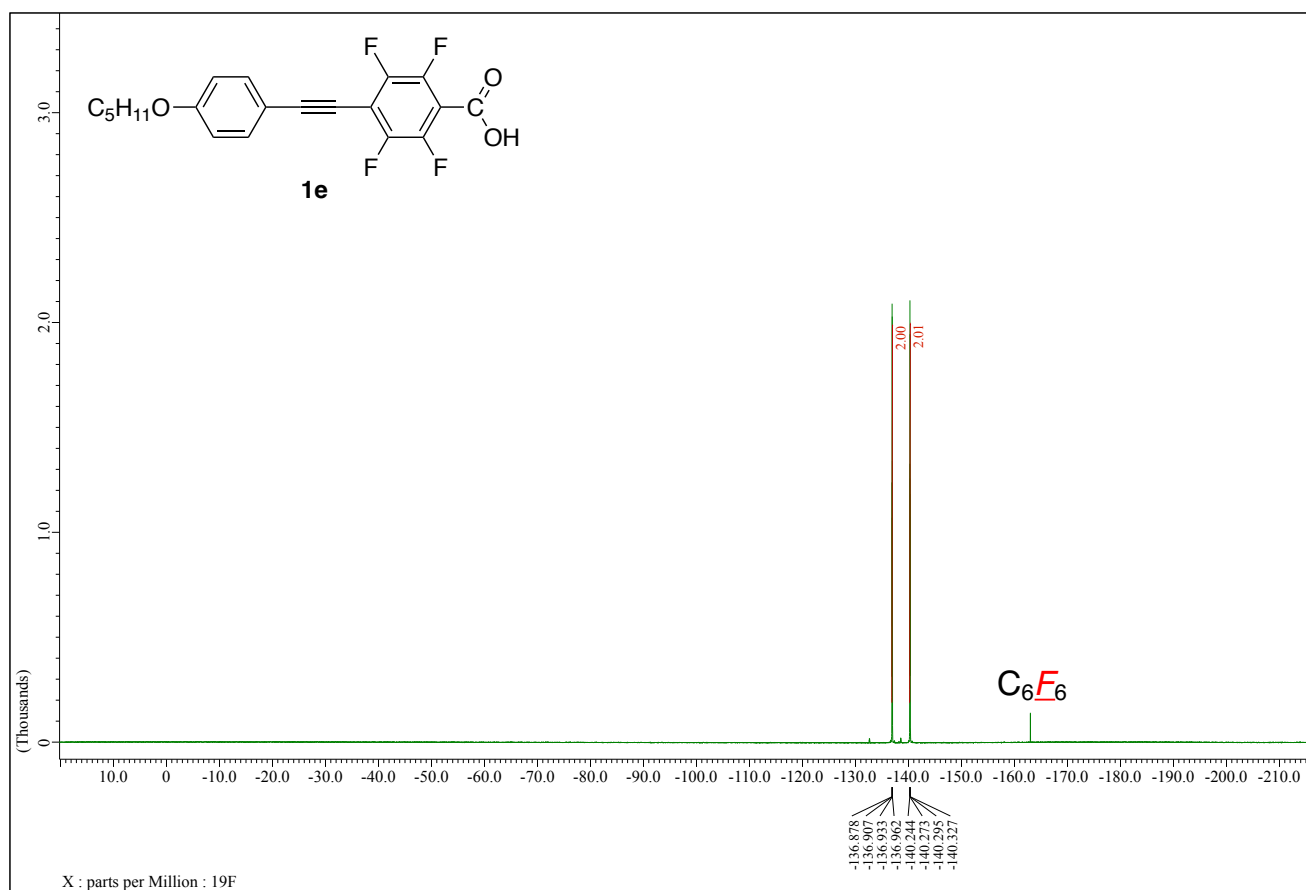

**Figure S15.** <sup>19</sup>F NMR spectrum of **1e** (acetone-*d*<sub>6</sub>, C<sub>6</sub>F<sub>6</sub>, 376 MHz).

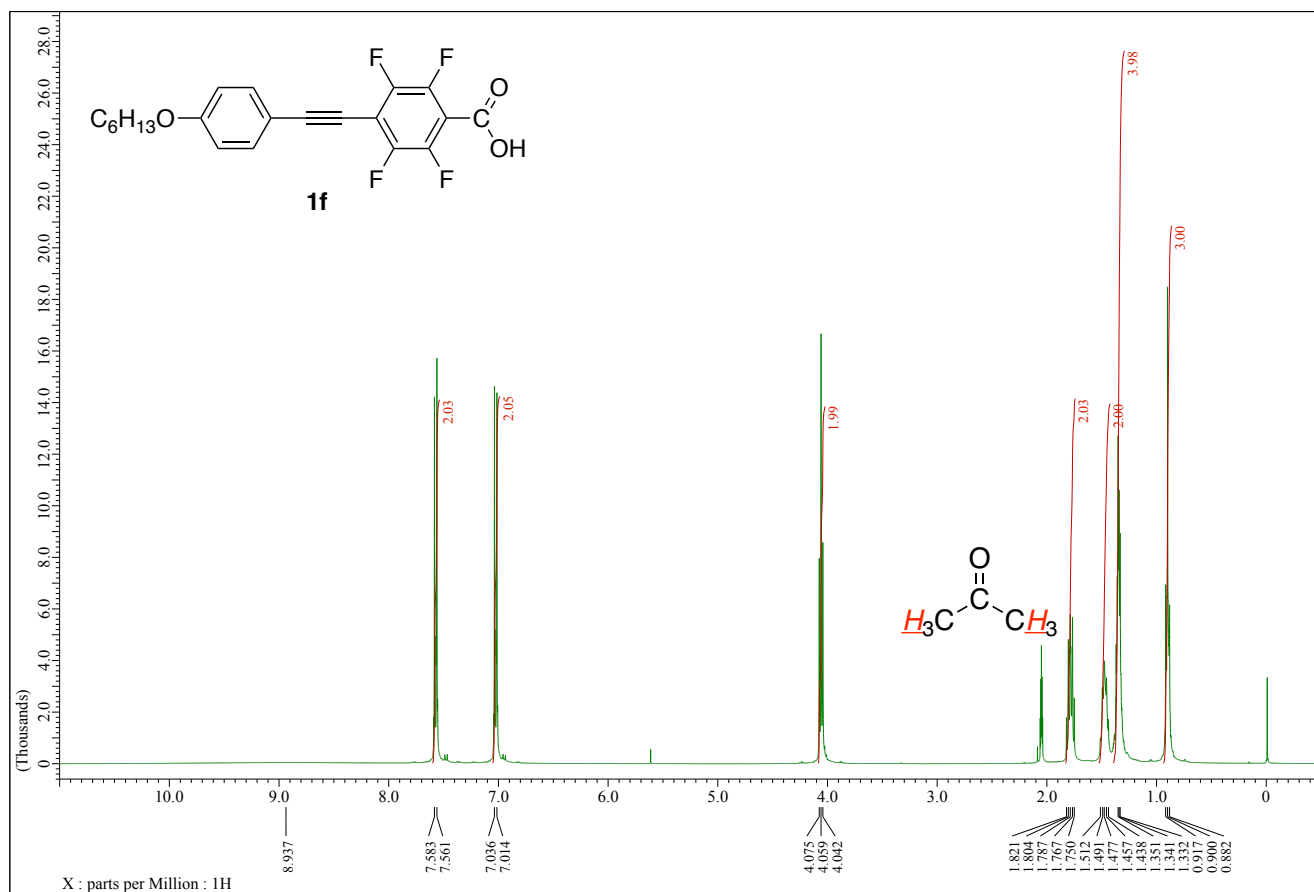

Figure S16. <sup>1</sup>H NMR spectrum of **1f** (acetone-*d*<sub>6</sub>, 400 MHz).

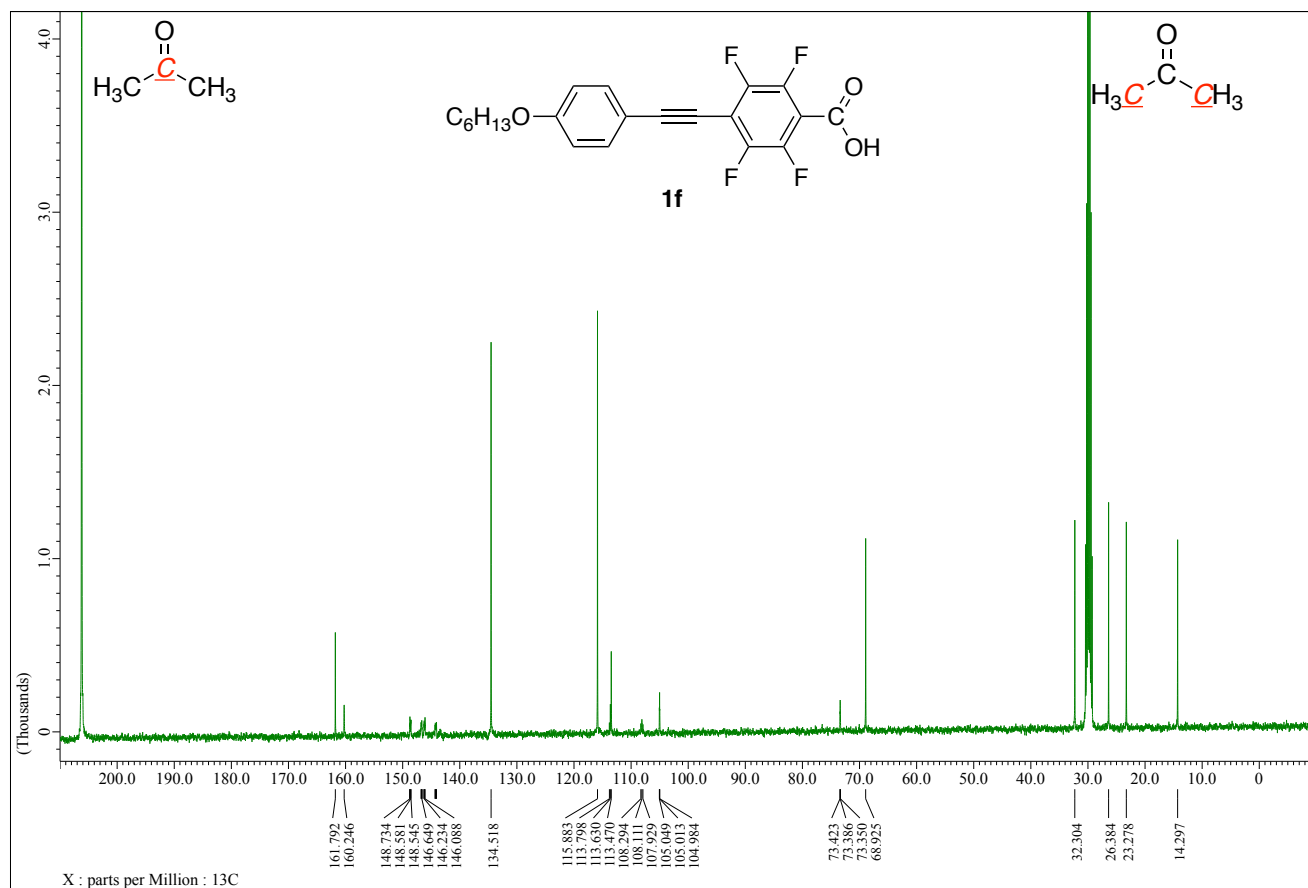

Figure S17. <sup>13</sup>C NMR spectrum of **1f** (acetone-*d*<sub>6</sub>, 100 MHz).



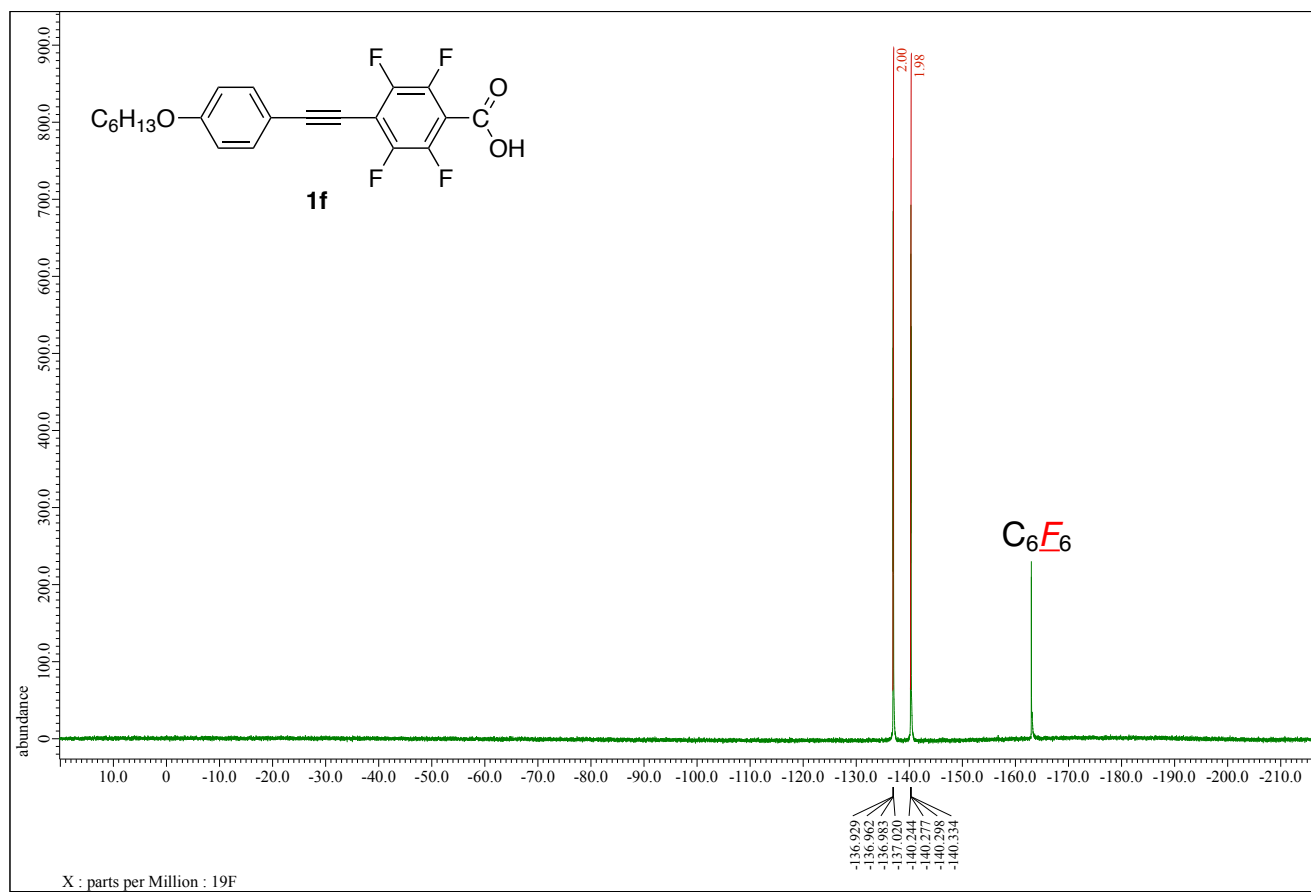

**Figure S18.**  $^{19}F$  NMR spectrum of **1f** (acetone- $d_6$ ,  $C_6F_6$ , 376 MHz).

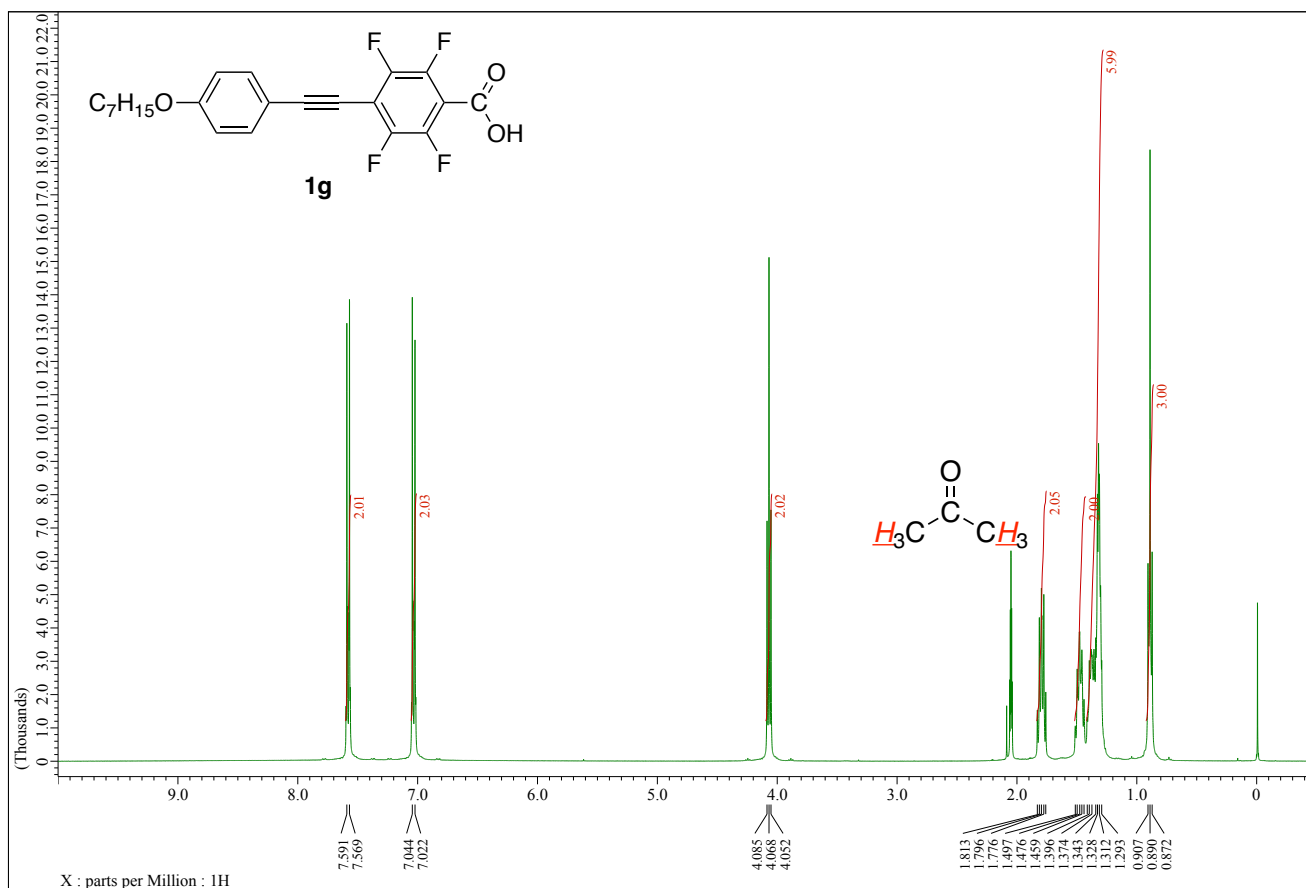

**Figure S19.**  $^1\text{H}$  NMR spectrum of **1g** (acetone- $d_6$ , 400 MHz).

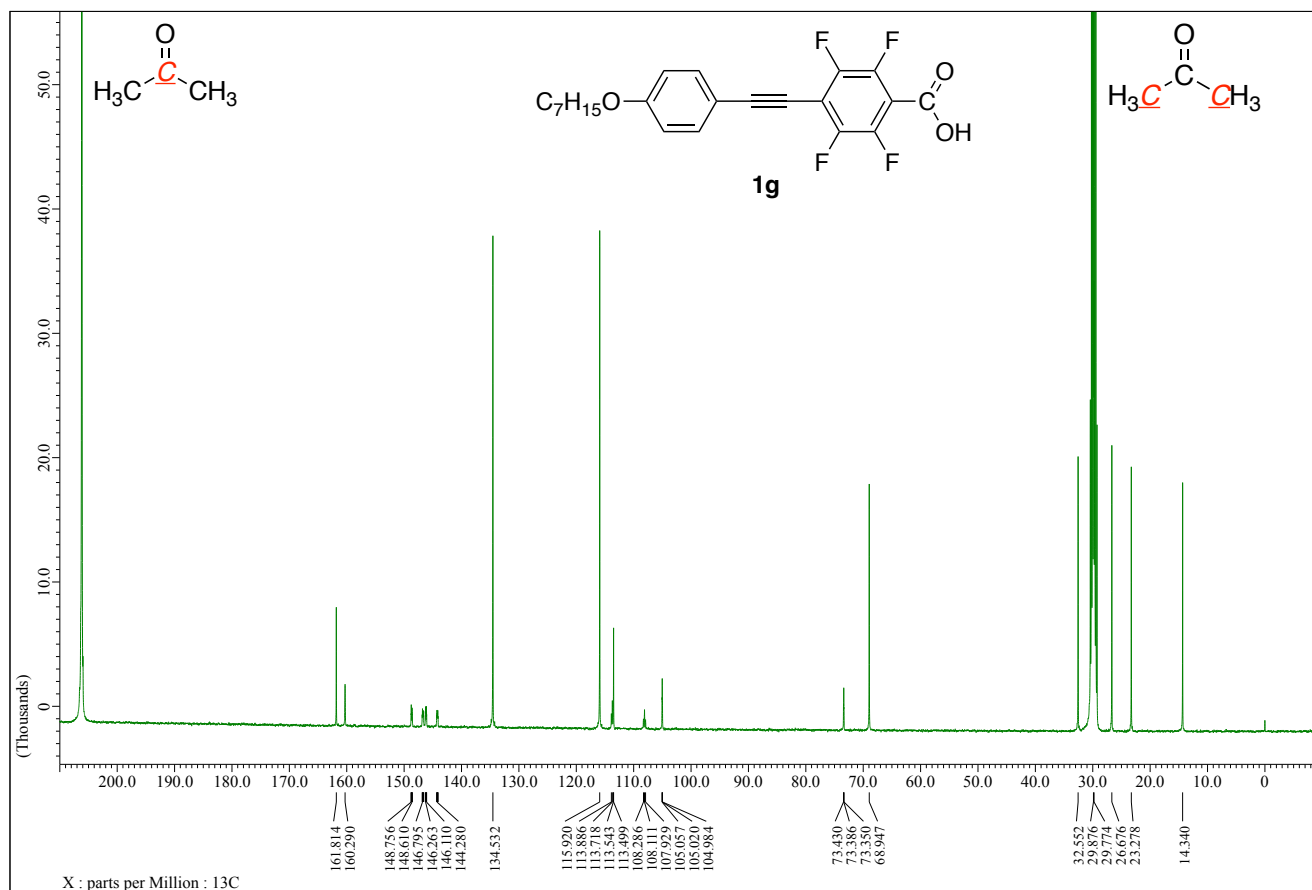

**Figure S20.**  $^{13}\text{C}$  NMR spectrum of **1g** (acetone- $d_6$ , 100 MHz).

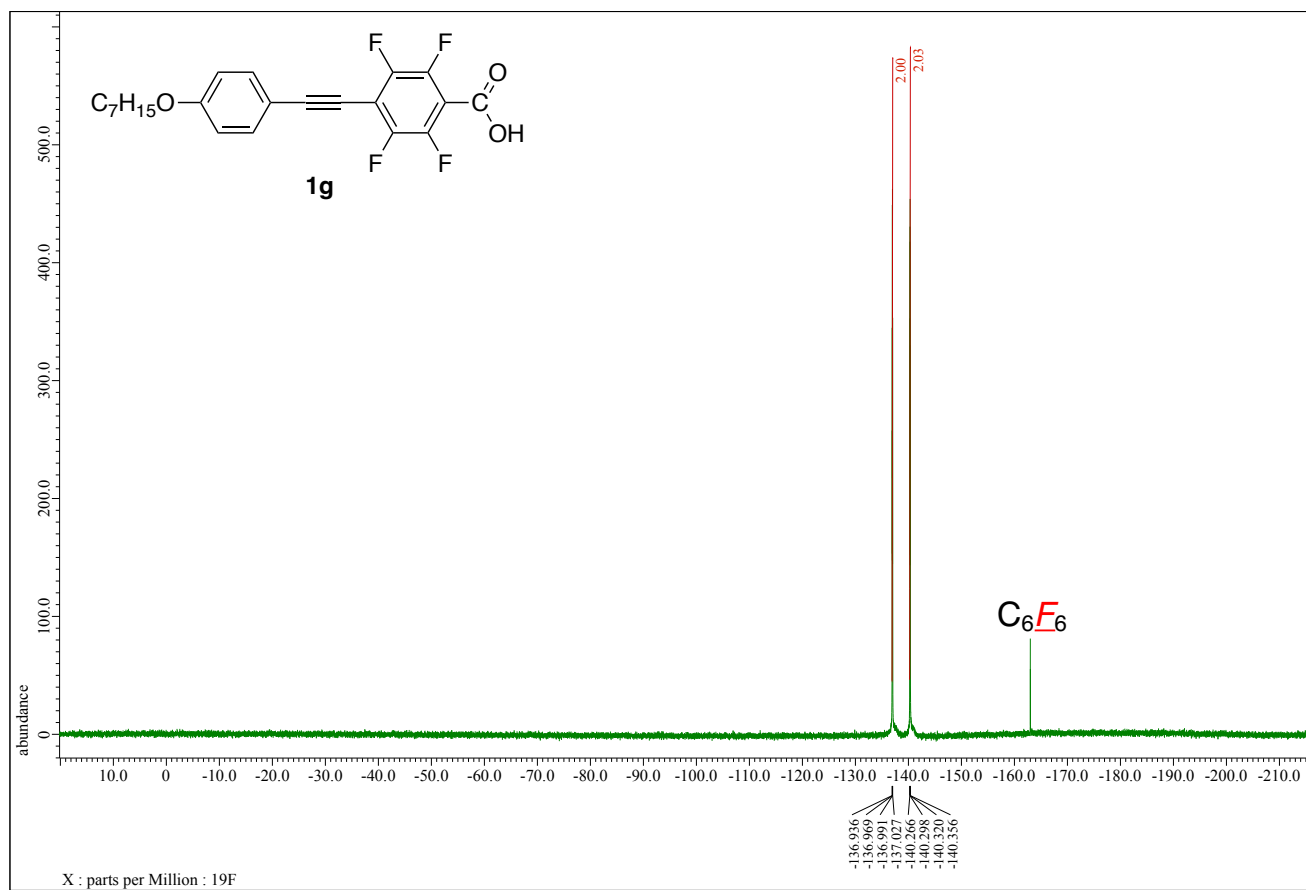

**Figure S21.** <sup>19</sup>F NMR spectrum of **1g** (acetone-*d*<sub>6</sub>, C<sub>6</sub>F<sub>6</sub>, 376 MHz).

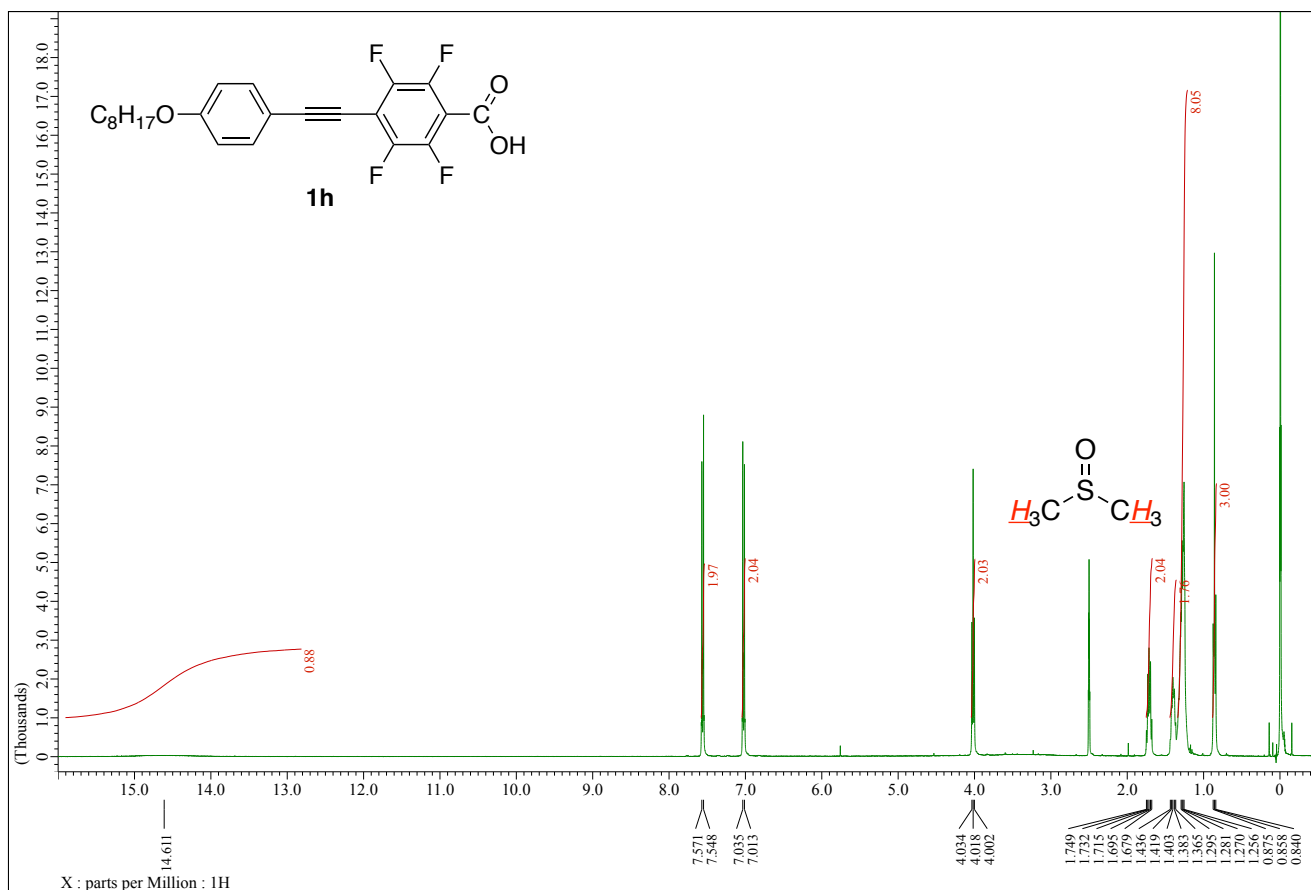

Figure S22. <sup>1</sup>H NMR spectrum of **1h** (DMSO-*d*<sub>6</sub>, 400 MHz).

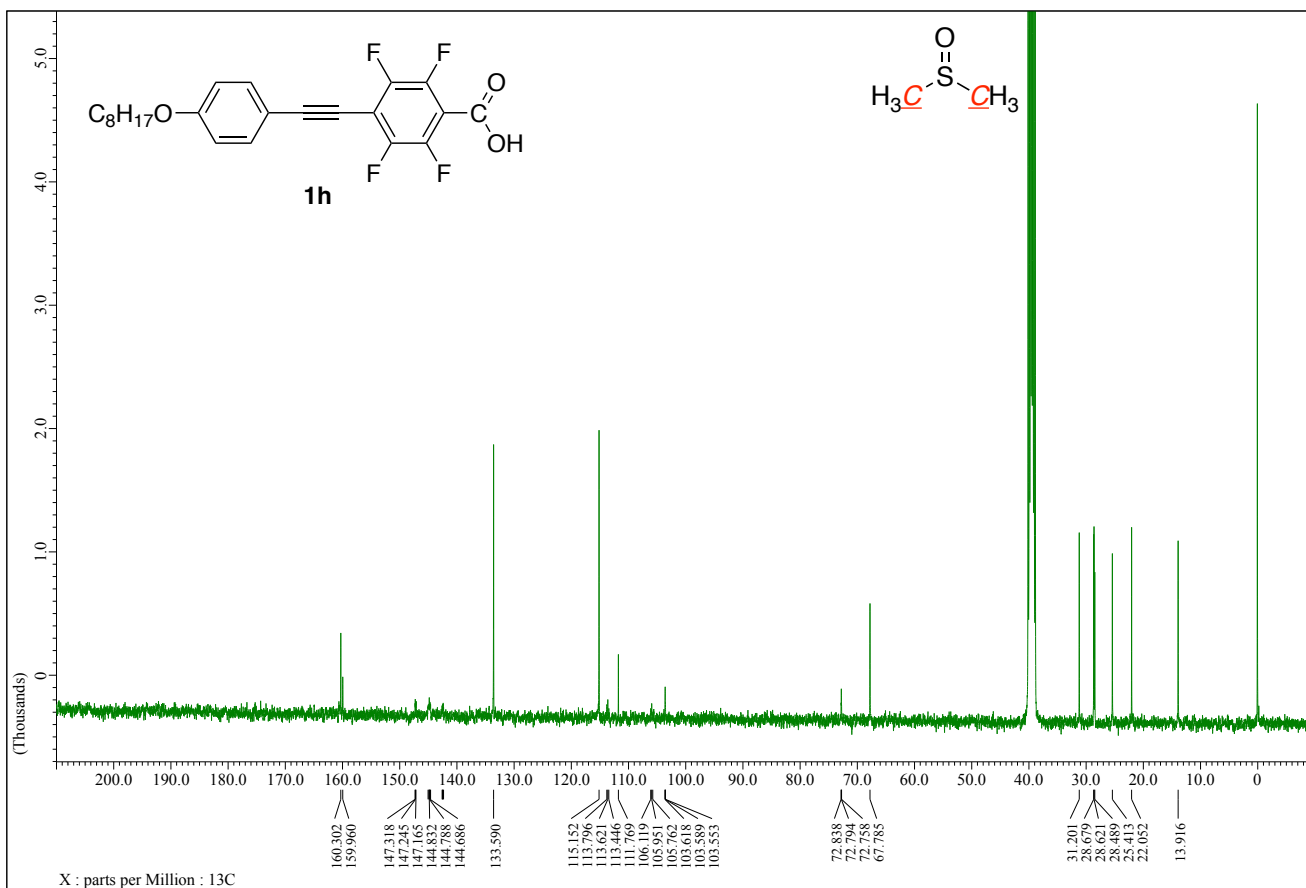

Figure S23. <sup>13</sup>C NMR spectrum of **1h** (DMSO-*d*<sub>6</sub>, 100 MHz).

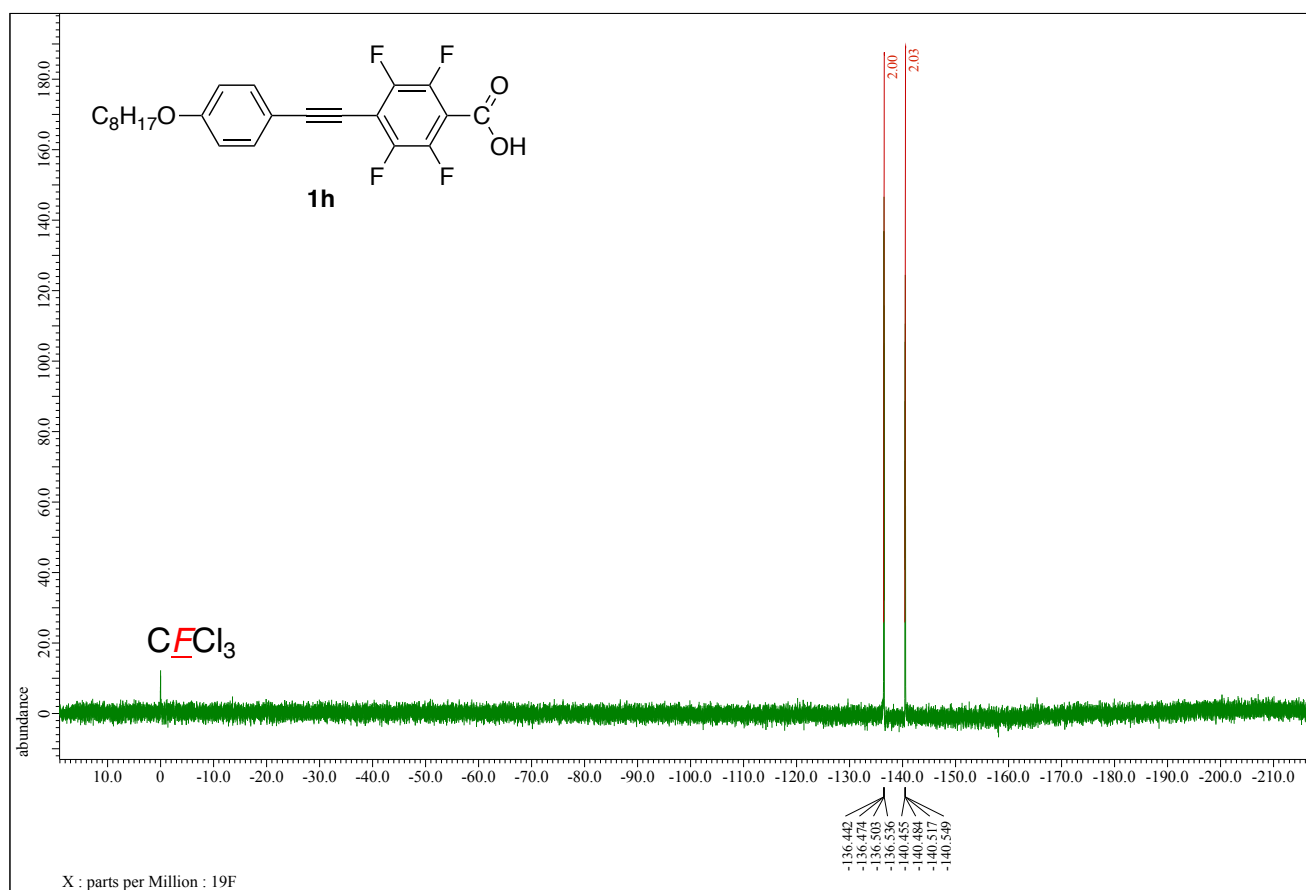

**Figure S24.**  $^{19}\text{F}$  NMR spectrum of **1h** (DMSO- $d_6$ ,  $\text{CFCl}_3$ , 376 MHz).

## Crystallographic analysis

Single crystal X-ray diffractions were recorded on an XtaLab AFC11 diffractometer (Rigaku). The reflection data were integrated, scaled, and averaged using CrysAlisPro (ver. 1.171.39.43a, Rigaku). Empirical absorption corrections were applied using the SCALE 3 ABSPACK scaling algorithm (CrysAlisPro). The structure were identified by a direct method (SHELXT-2018/2) and refined using a full matrix least square method (SHELXL-2014/7) visualized by Olex2. The crystallographic data were deposited into the Cambridge Crystallographic Data Centre (CCDC) database. These data can be obtained free of charge from the CCDC via [www.ccdc.cam.ac.uk/data\\_request/cif](http://www.ccdc.cam.ac.uk/data_request/cif).

**Table S1.** Crystallographic data of **1a** and **1e**

|                                                                              | <b>1a</b>                                                    | <b>1e</b>                                                     |
|------------------------------------------------------------------------------|--------------------------------------------------------------|---------------------------------------------------------------|
| CCDC #                                                                       | 2193549                                                      | 2193550                                                       |
| Empirical Formula                                                            | C <sub>16</sub> H <sub>8</sub> F <sub>4</sub> O <sub>3</sub> | C <sub>20</sub> H <sub>16</sub> F <sub>4</sub> O <sub>3</sub> |
| Formula weight                                                               | 324.22                                                       | 380.33                                                        |
| Temperature [K]                                                              | 293                                                          | 293                                                           |
| Crystal Color / Habit                                                        | Colourless / Block                                           | Colourless / Block                                            |
| Crystal Size [mm]                                                            | 0.542 x 0.293 x 0.231                                        | 0.550 x 0.330 x 0.190                                         |
| Crystal System                                                               | Triclinic                                                    | Monoclinic                                                    |
| Space Group                                                                  | <i>P</i> −1                                                  | <i>C</i> 2/ <i>c</i>                                          |
| <i>a</i> [Å]                                                                 | 6.4440(3)                                                    | 23.399(4)                                                     |
| <i>b</i> [Å]                                                                 | 7.329(3)                                                     | 8.7158(7)                                                     |
| <i>c</i> [Å]                                                                 | 15.3823(7)                                                   | 19.649(2)                                                     |
| $\alpha$ [°]                                                                 | 95.185(3)                                                    | 90                                                            |
| $\beta$ [°]                                                                  | 100.896(4)                                                   | 115.880(14)                                                   |
| $\gamma$ [°]                                                                 | 99.639(3)                                                    | 90                                                            |
| <i>V</i> [Å <sup>3</sup> ]                                                   | 701.88(6)                                                    | 3605.3(8)                                                     |
| <i>Z</i>                                                                     | 2                                                            | 8                                                             |
| <i>R</i> [ <i>F</i> <sup>2</sup> > 2 <i>s</i> ( <i>F</i> <sup>2</sup> )] [a] | 0.0480                                                       | 0.0559                                                        |
| <i>wR</i> <sub>2</sub> ( <i>F</i> <sup>2</sup> ) [b]                         | 0.1528                                                       | 0.1888                                                        |

$$[a] R = \Sigma ||F_o| - |F_c|| / \Sigma |F_o|. [b] wR = \{[\Sigma w(|F_o| - |F_c|)] / \Sigma w|F_o|\}^{1/2}.$$

## Phase transition behavior

(a) 1a

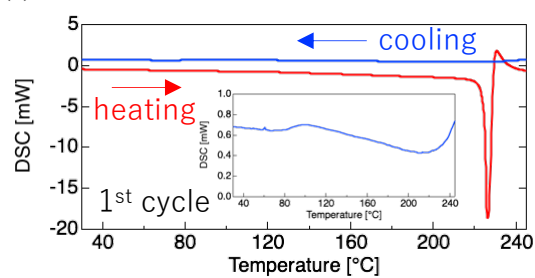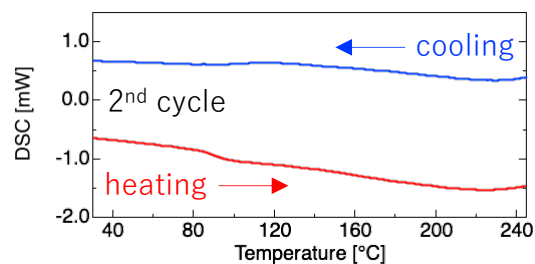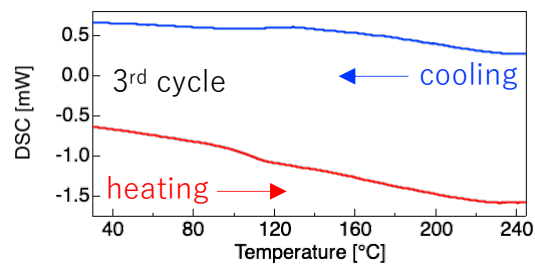

(b) 1b

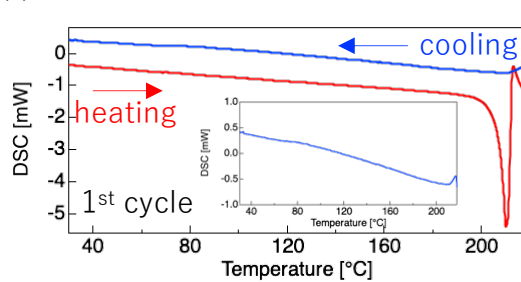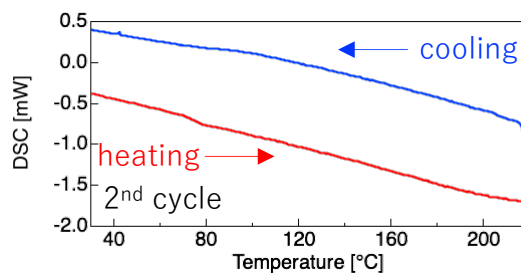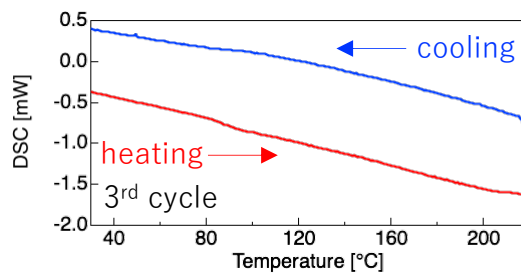

(c) 1c

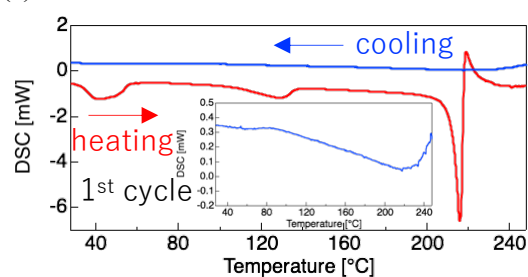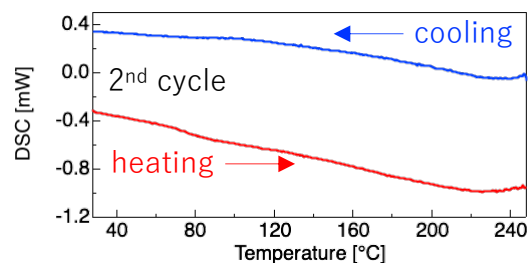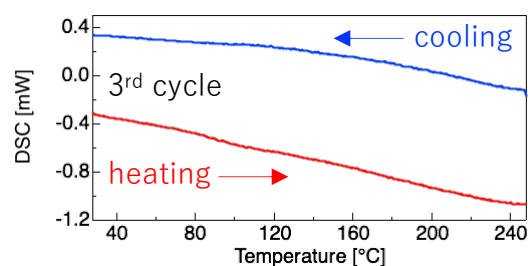

(d) 1d

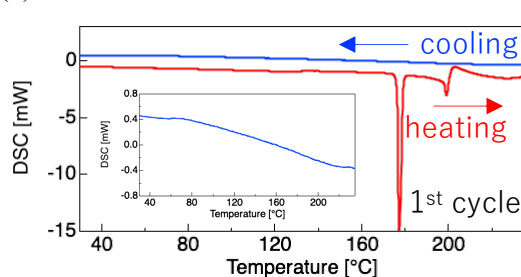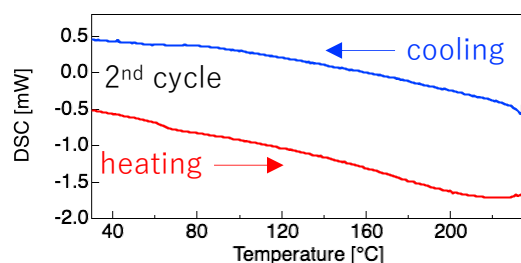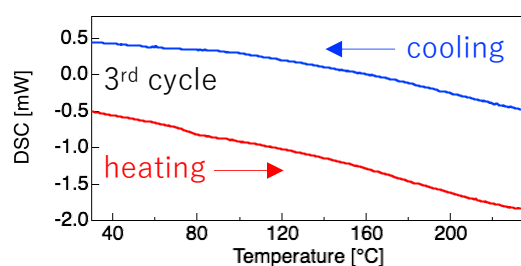

(e) **1e**

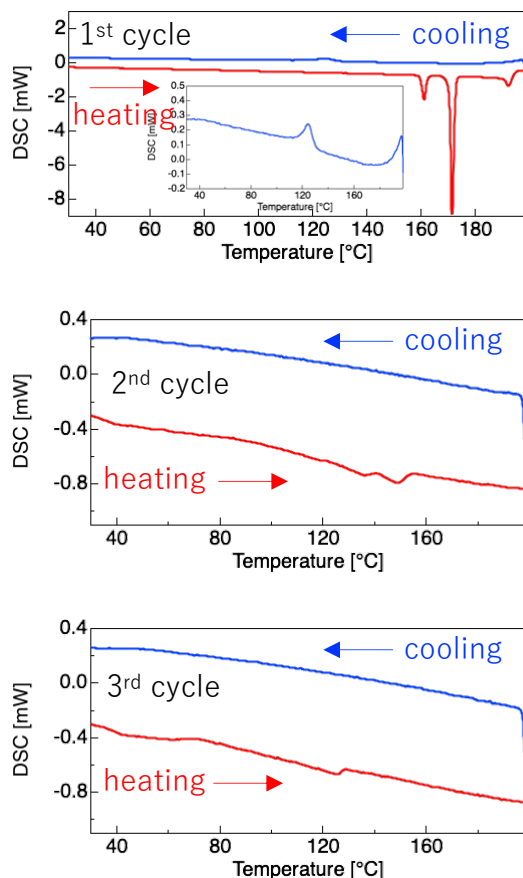

(f) **1f**

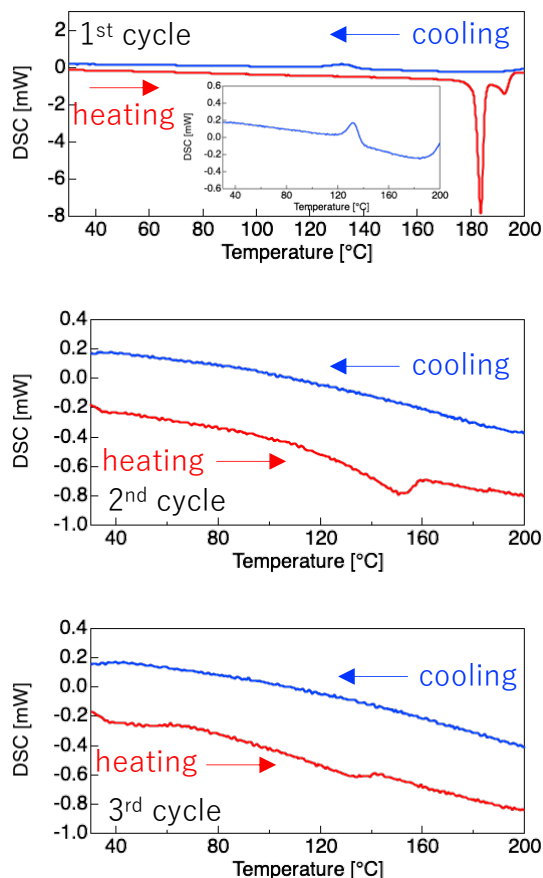

(g) **1g**

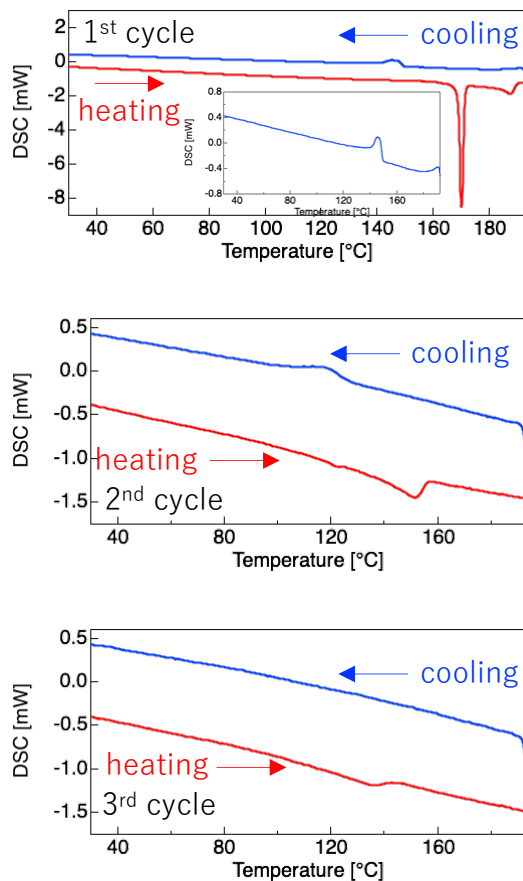

(h) **1h**

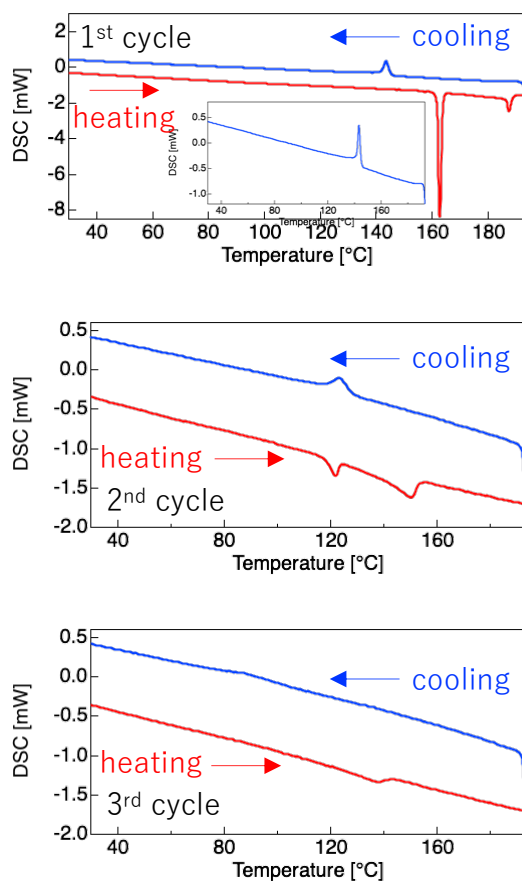

**Figure S25.** DSC Thermograms of **1a–h** under N<sub>2</sub> atmosphere. Scan rate: 5.0 °C min<sup>-1</sup> or 10 °C min<sup>-1</sup>.



**Table S2.** Phase transition behavior of **1a–h** observed by DSC measurement.

| Molecule  | Phase sequence          |                                    | Temperature<br>[°C] | Enthalpy ( $\Delta H$ )<br>[kJ mol <sup>-1</sup> ] | Entropy ( $\Delta S$ )<br>[J mol <sup>-1</sup> K <sup>-1</sup> ] |
|-----------|-------------------------|------------------------------------|---------------------|----------------------------------------------------|------------------------------------------------------------------|
| <b>1a</b> | 1 <sup>st</sup> Heating | Cry-Iso                            | 224                 | 47.4                                               | 96.0                                                             |
|           | 1 <sup>st</sup> Cooling | Iso-G                              | 165                 | — a                                                | — a                                                              |
|           | 2 <sup>nd</sup> Heating | G-Iso                              | 158                 | — a                                                | — a                                                              |
|           | 2 <sup>nd</sup> Cooling | Iso-G                              | 168                 | — a                                                | — a                                                              |
| <b>1b</b> | 1 <sup>st</sup> Heating | Cry-Iso                            | 207                 | 44.8                                               | 91.0                                                             |
|           | 1 <sup>st</sup> Cooling | Iso-G                              | 140                 | —                                                  | —                                                                |
|           | 2 <sup>nd</sup> Heating | G-Iso                              | 137                 | — a                                                | — a                                                              |
|           | 2 <sup>nd</sup> Cooling | Iso-G                              | 146                 | — a                                                | — a                                                              |
| <b>1c</b> | 1 <sup>st</sup> Heating | Cry-Iso                            | 211                 | 49.6                                               | 102.0                                                            |
|           | 1 <sup>st</sup> Cooling | Iso–Cry                            | 158                 | — a                                                | — a                                                              |
|           | 2 <sup>nd</sup> Heating | G-Iso                              | 142                 | — a                                                | — a                                                              |
|           | 2 <sup>nd</sup> Cooling | Iso-G                              | 137                 | — a                                                | — a                                                              |
| <b>1d</b> | 1 <sup>st</sup> Heating | Cry-N                              | 176                 | 29.9                                               | 66.7                                                             |
|           |                         | N-Iso                              | 198                 | 7.27                                               | 15.4                                                             |
|           | 1 <sup>st</sup> Cooling | Iso-G                              | 124                 | — a                                                | — a                                                              |
|           | 2 <sup>nd</sup> Heating | G-Iso                              | 111                 | — a                                                | — a                                                              |
|           | 2 <sup>nd</sup> Cooling | Iso-G                              | 105                 | — a                                                | — a                                                              |
|           |                         |                                    |                     |                                                    |                                                                  |
| <b>1e</b> | 1 <sup>st</sup> Heating | Cry <sup>1</sup> -Cry <sup>2</sup> | 160                 | 8.9                                                | 20.4                                                             |
|           |                         | Cry <sup>2</sup> -N                | 170                 | 39.3                                               | 88.6                                                             |
|           |                         | N-Iso                              | 191                 | 5.0                                                | 10.8                                                             |
|           | 1 <sup>st</sup> Cooling | Iso-G                              | 132                 | — a                                                | — a                                                              |
|           | 2 <sup>nd</sup> Heating | G-Iso                              | 137                 | — a                                                | — a                                                              |
|           | 2 <sup>nd</sup> Cooling | Iso-G                              | 134                 | — a                                                | — a                                                              |
|           |                         |                                    |                     |                                                    |                                                                  |
| <b>1f</b> | 1 <sup>st</sup> Heating | Cry-N                              | 181                 | 27.2                                               | 60.0                                                             |
|           |                         | N-Iso                              | 190                 | 3.77                                               | 8.14                                                             |
|           | 1 <sup>st</sup> Cooling | Iso-G                              | 141                 | — a                                                | — a                                                              |
|           | 2 <sup>nd</sup> Heating | G-Iso                              | 122                 | — a                                                | — a                                                              |
|           | 2 <sup>nd</sup> Cooling | Iso-G                              | 121                 | — a                                                | — a                                                              |
| <b>1g</b> | 1 <sup>st</sup> Heating | Cry-N                              | 169                 | 29.2                                               | 66.1                                                             |
|           |                         | N-Iso                              | 184                 | 7.63                                               | 16.7                                                             |
|           | 1 <sup>st</sup> Cooling | Iso-G                              | 150                 | −5.03                                              | −11.9                                                            |
|           | 2 <sup>nd</sup> Heating | G-Iso                              | 131                 | — a                                                | — a                                                              |
|           | 2 <sup>nd</sup> Cooling | Iso-G                              | 127                 | — a                                                | — a                                                              |
| <b>1h</b> | 1 <sup>st</sup> Heating | Cry-N                              | 161                 | 31.2                                               | 71.6                                                             |
|           |                         | N-Iso                              | 186                 | 5.53                                               | 12.0                                                             |
|           | 1 <sup>st</sup> Cooling | Iso-N                              | 146                 | −7.01                                              | −16.8                                                            |
|           | 2 <sup>nd</sup> Heating | G-N                                | 118                 | — a                                                | — a                                                              |

|                         |       |     |                |                |
|-------------------------|-------|-----|----------------|----------------|
|                         | N-Iso | 137 | — <sup>a</sup> | — <sup>a</sup> |
| 2 <sup>nd</sup> Cooling | Iso-G | 131 | — <sup>a</sup> | — <sup>a</sup> |

---

<sup>a</sup> Determined by POM observation.

## TG Analysis

(a) **1a**

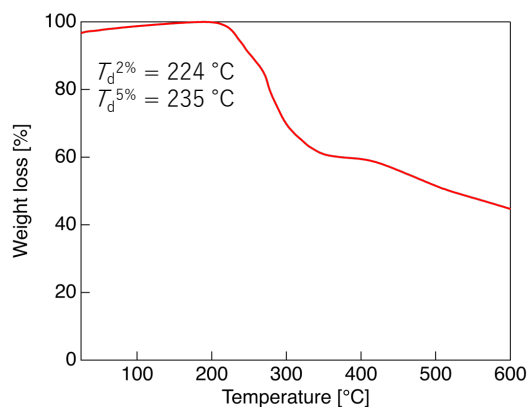

(b) **1b**

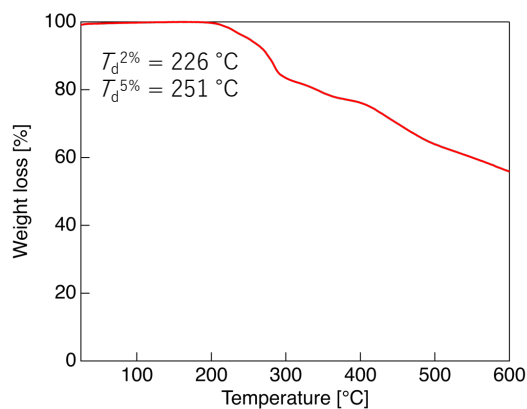

(c) **1c**

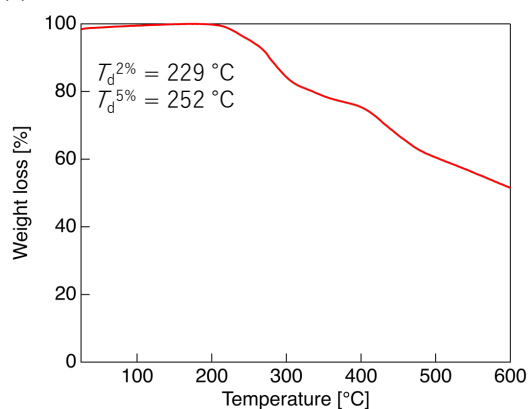

(d) **1d**

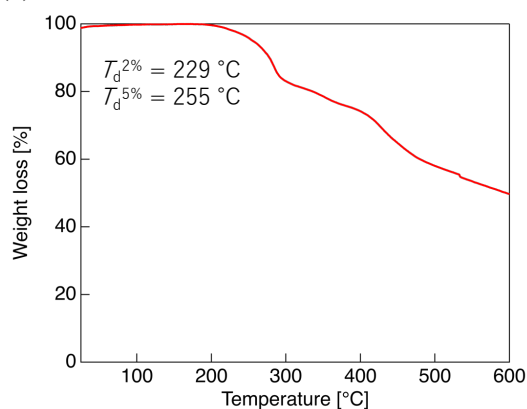

(e) **1e**

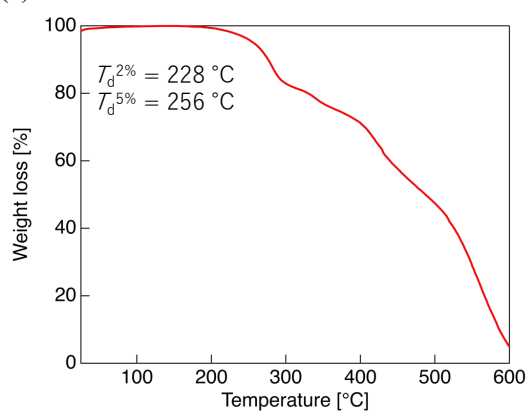

(f) **1f**

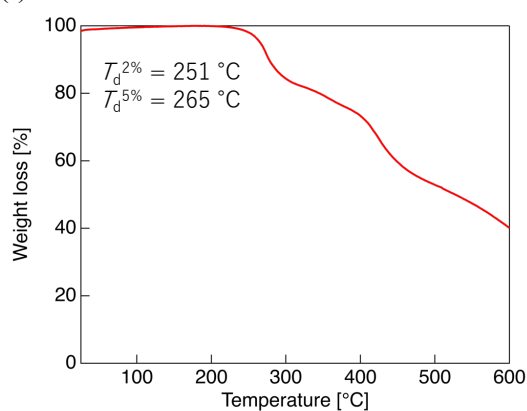

(g) **1g**

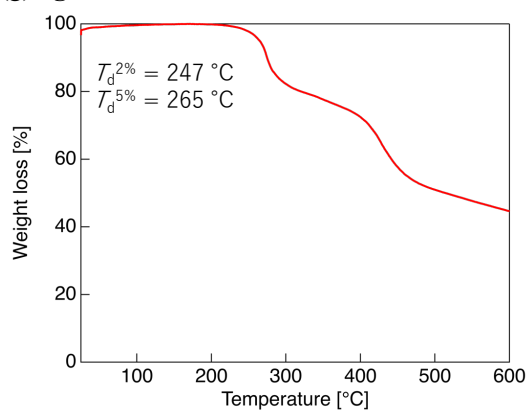

(h) **1h**

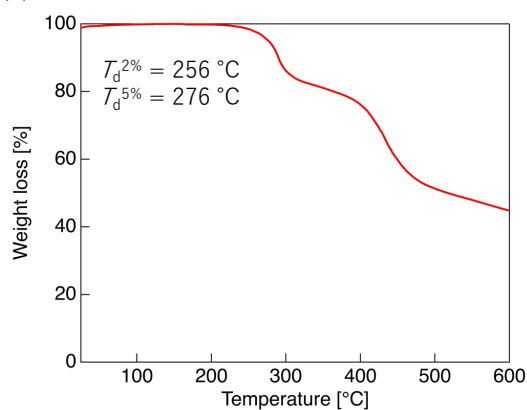

**Figure S26.** TGA Thermograms of **1a–h** under N<sub>2</sub> atmosphere. Scan rate: 10 °C min<sup>-1</sup>.

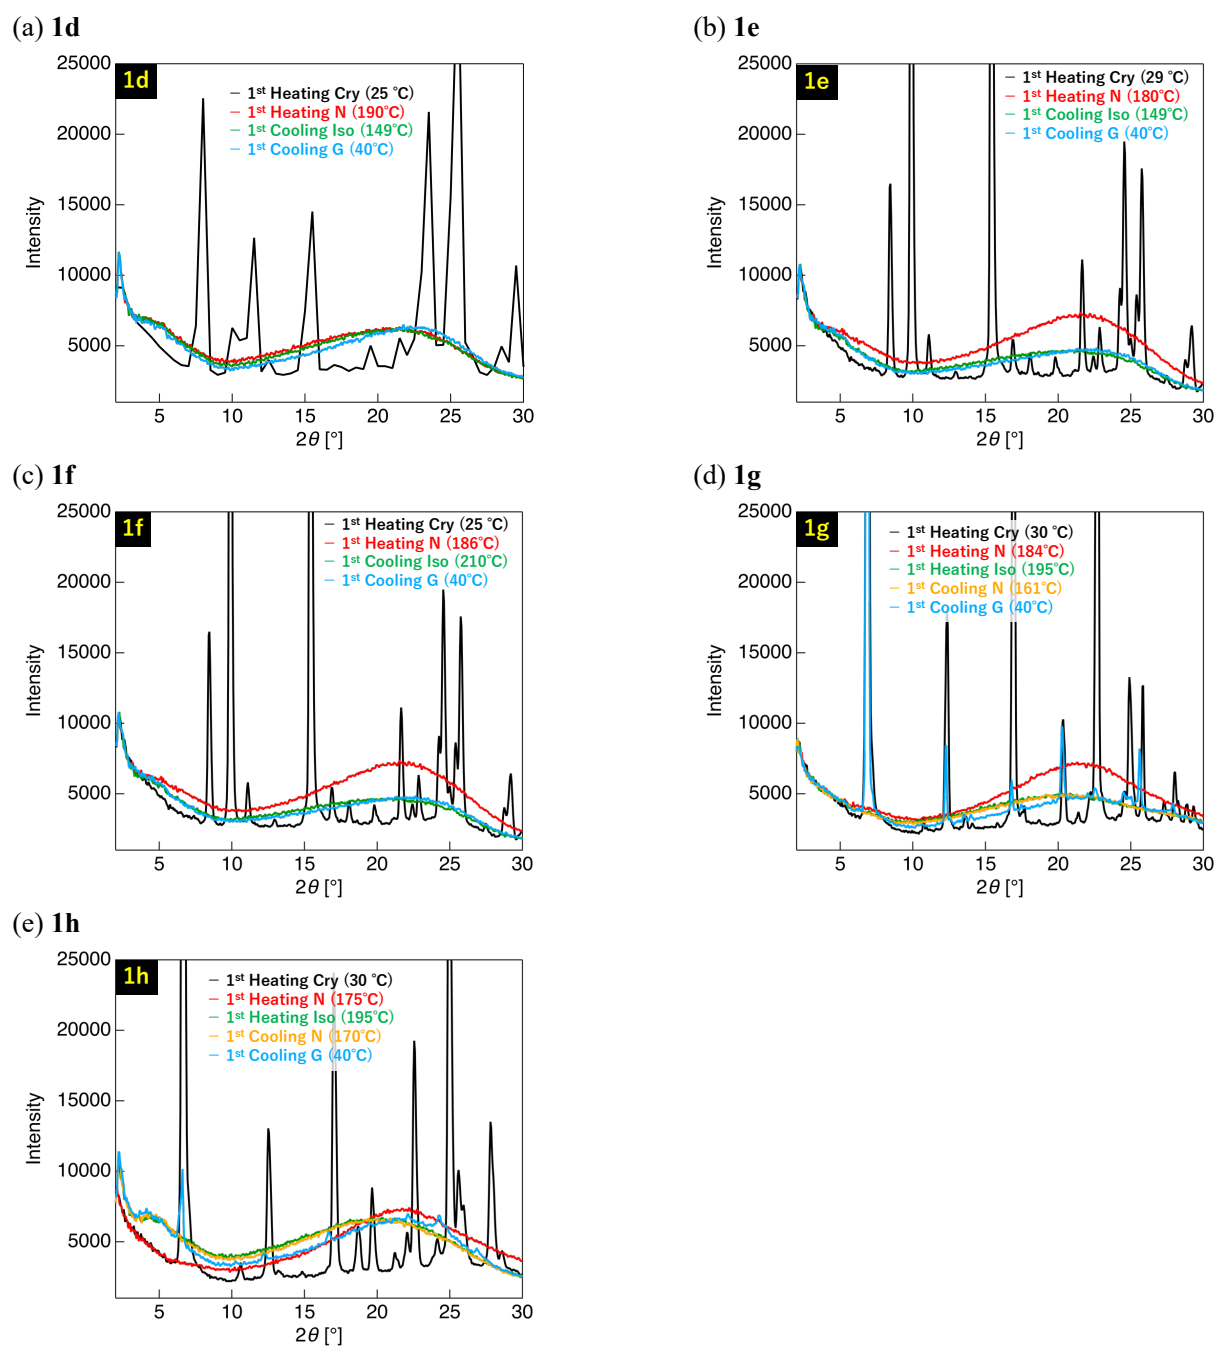

**Figure S27.** VT-PXRD pattern of **1d–h** during the 1<sup>st</sup> heating and cooling processes.

## Photophysical behavior

### CH<sub>2</sub>Cl<sub>2</sub> solution phase

(a) **1a**

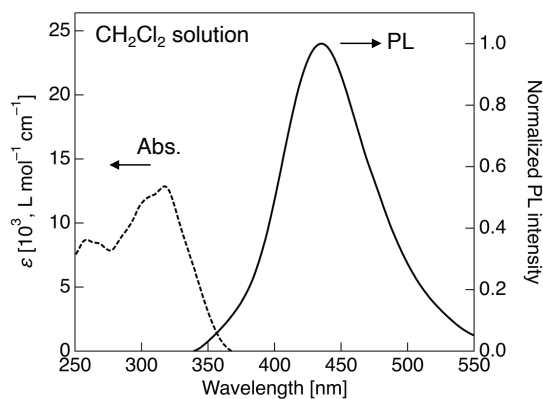

(b) **1b**

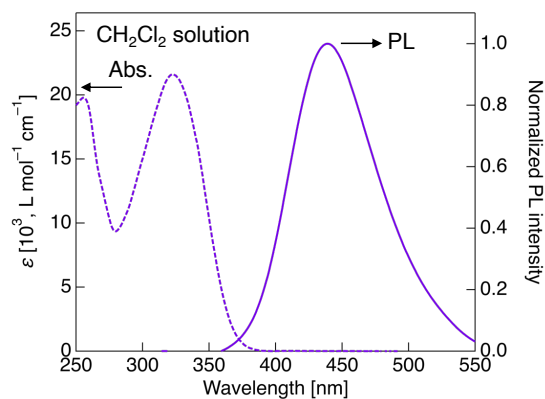

(c) **1c**

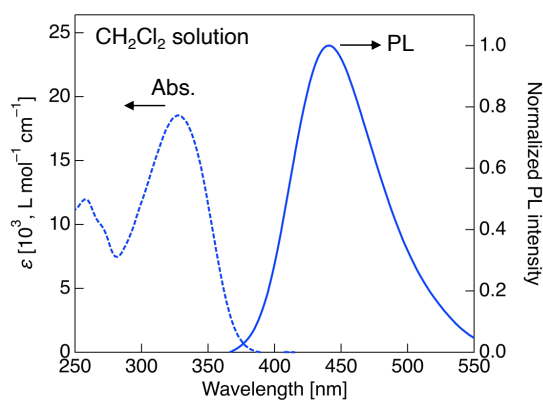

(d) **1d**

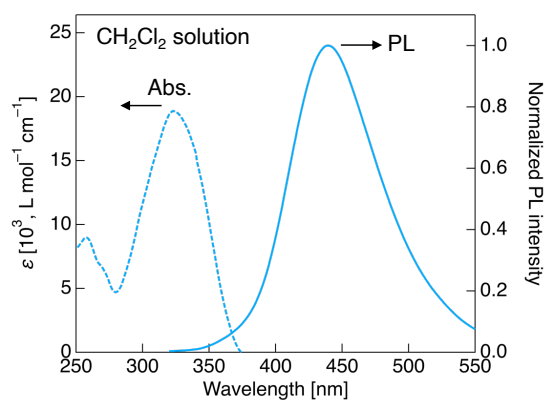

(e) **1e**

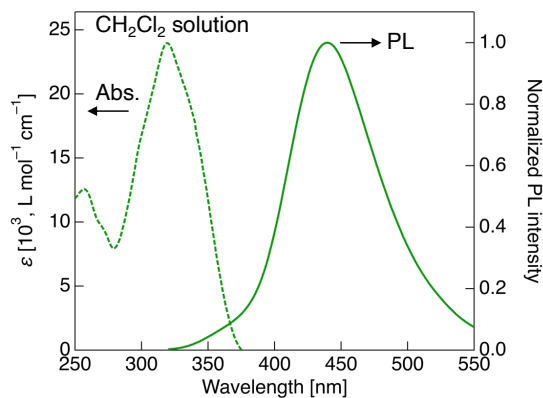

(f) **1f**

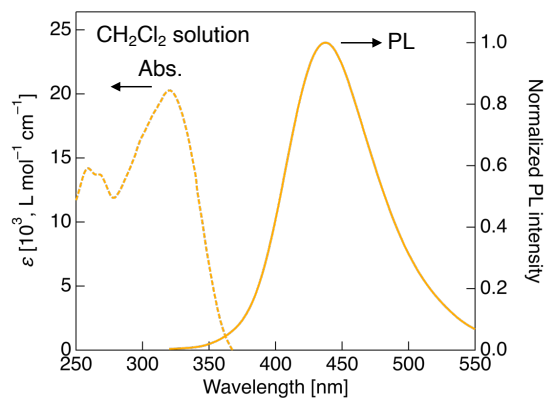

(g) **1g**

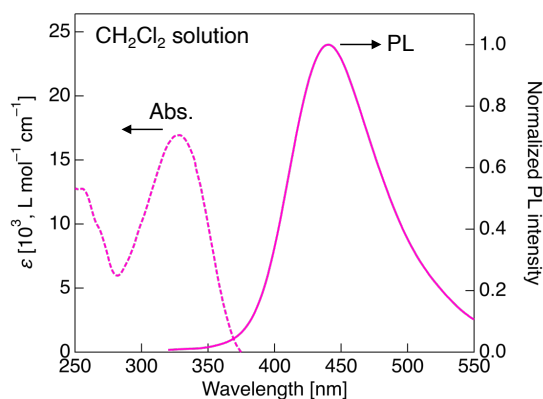

(h) **1h**

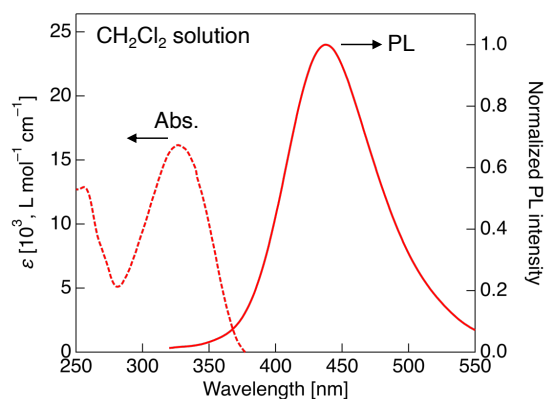

**Figure S28.** UV-vis absorption and PL spectrum of **1a–h** in CH<sub>2</sub>Cl<sub>2</sub> solution ( $1.0 \times 10^{-5}$  mol L<sup>-1</sup>).

## Solvatochromic PL behavior

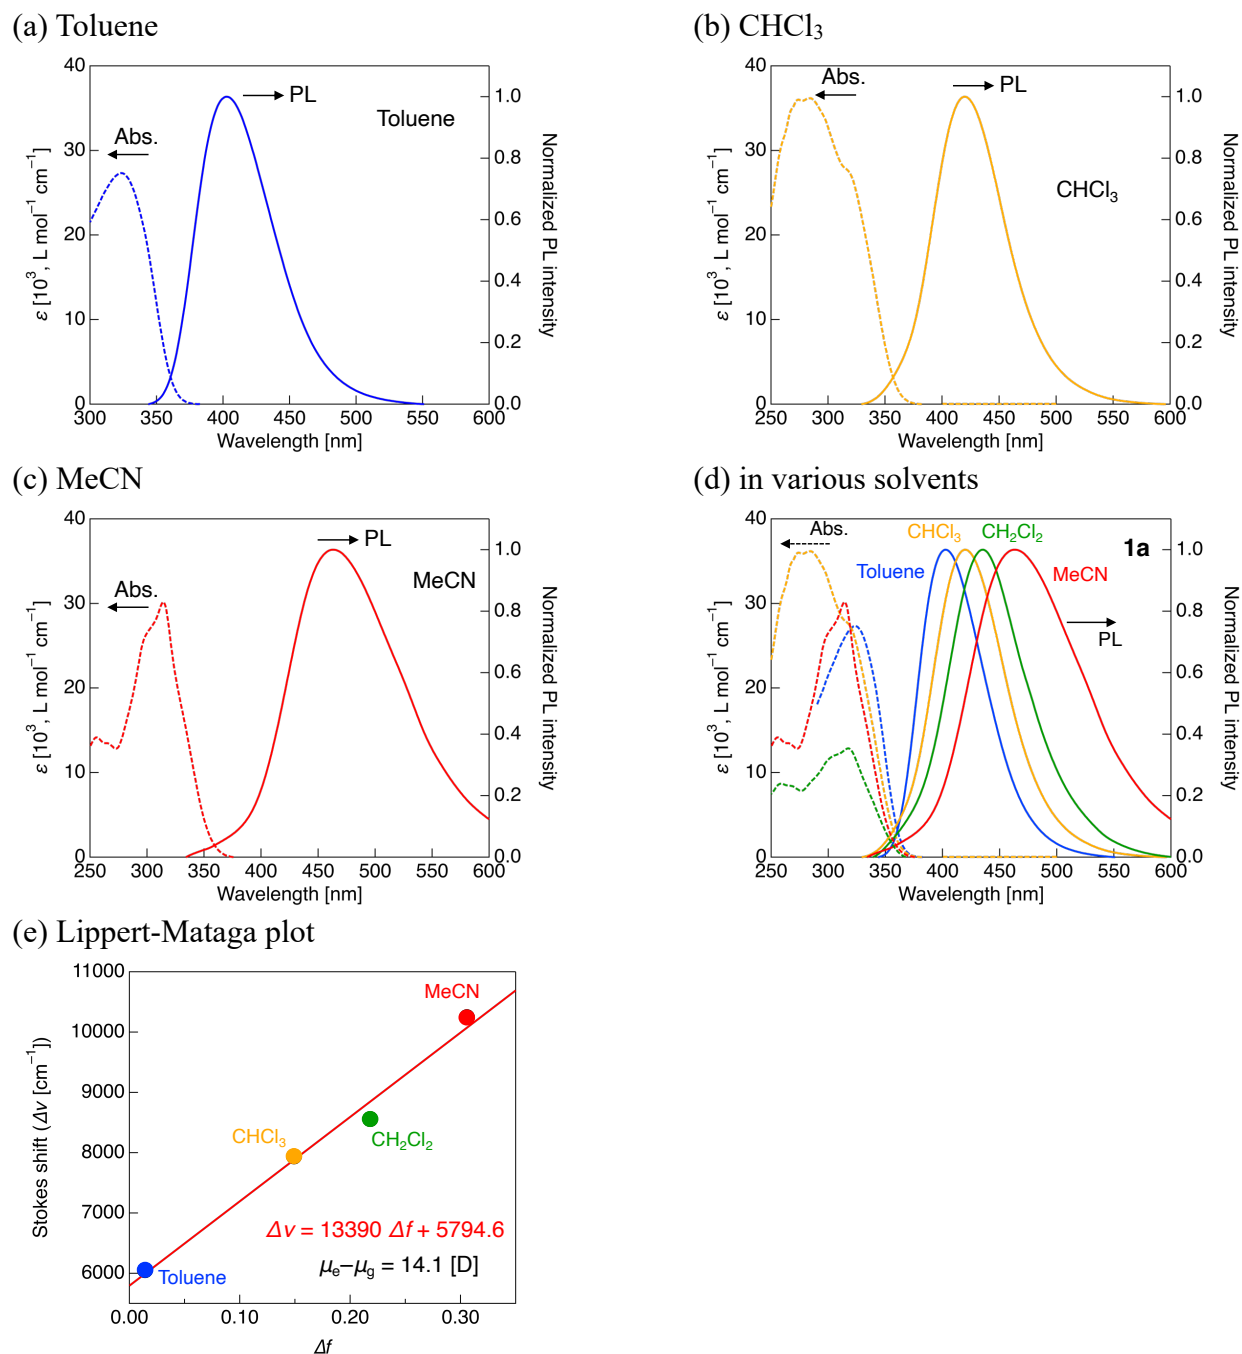

**Figure S29.** UV-vis absorption and PL spectra of **1a** in a different solvent: (a) toluene, (b) CHCl<sub>3</sub>, (c) MeCN. (d) in various solvents, (e) Lippert-Mataga plot of **1a**.

**Table S3.** Solvent effect on the photophysical behavior.

|                                 | $\epsilon$ (25 °C) | $n$   | $\Delta f$ | $\nu_{\text{Abs}}$ | $\nu_{\text{F}}$ | $\Delta\nu$ |
|---------------------------------|--------------------|-------|------------|--------------------|------------------|-------------|
| Toluene                         | 2.3807             | 1.494 | 0.01416715 | 30864              | 24814            | 6050        |
| CHCl <sub>3</sub>               | 4.806              | 1.443 | 0.14909508 | 31746              | 23810            | 7936        |
| CH <sub>2</sub> Cl <sub>2</sub> | 8.93               | 1.421 | 0.21817531 | 31546              | 22989            | 8557        |
| MeCN                            | 35.94              | 1.341 | 0.30574908 | 31847              | 21598            | 10249       |

## Cry phase

(a) **1a**

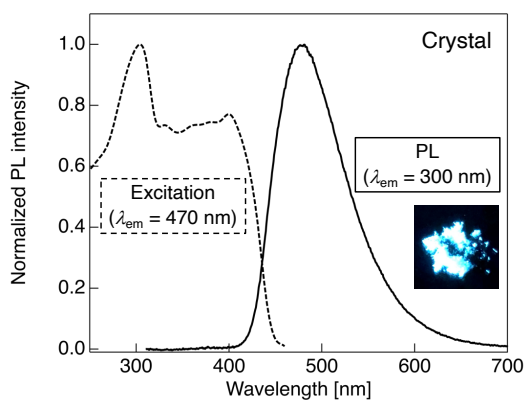

(b) **1b**

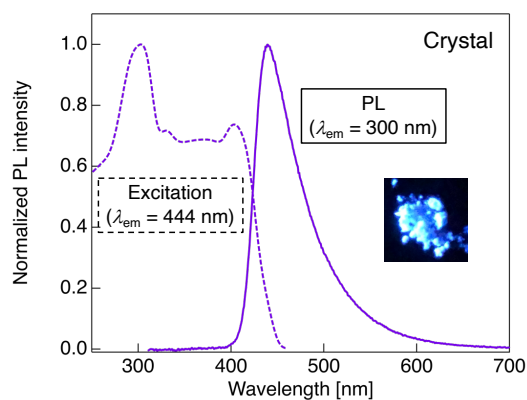

(c) **1c**

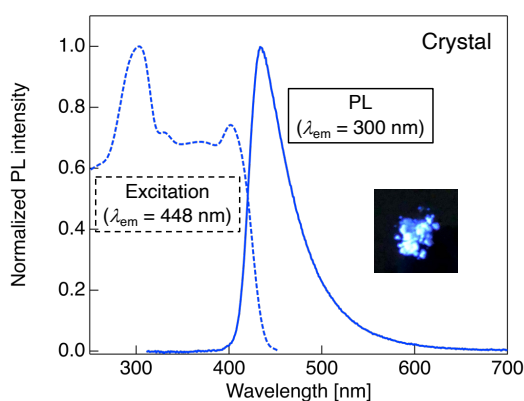

(d) **1d**

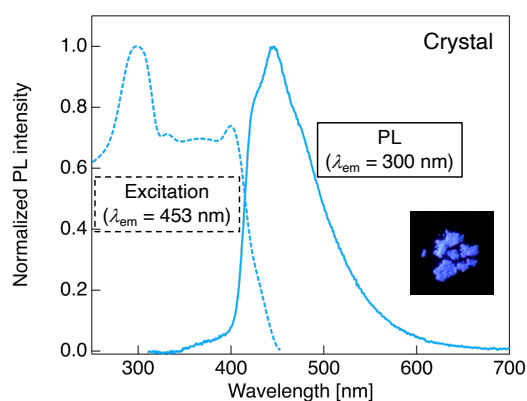

(e) **1e**

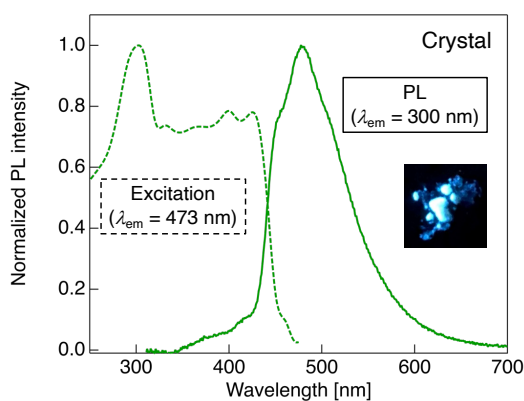

(f) **1f**

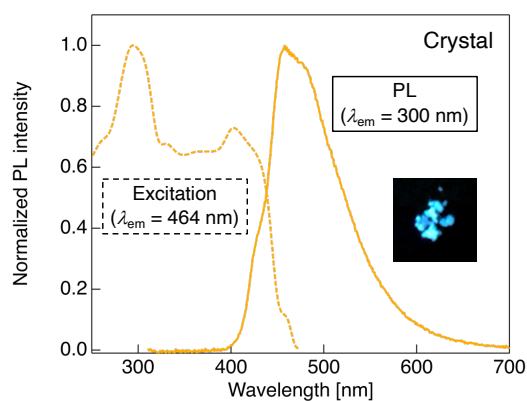

(g) **1g**

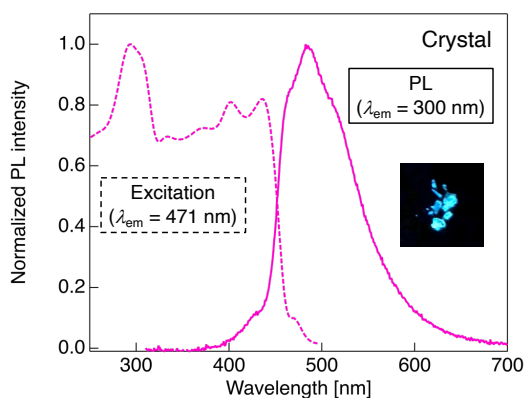

(h) **1h**

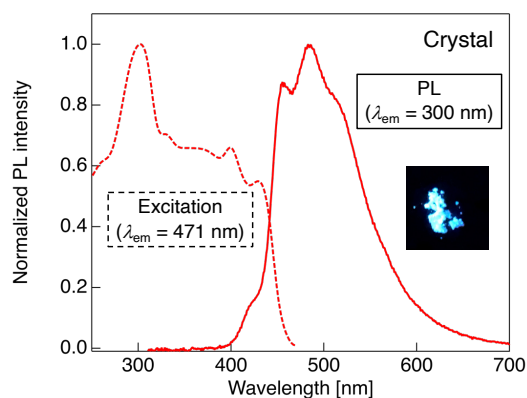

**Figure S30.** Excitation and PL spectra of **1a–h** in Cry phase.

## Nematic LC phase

(a)

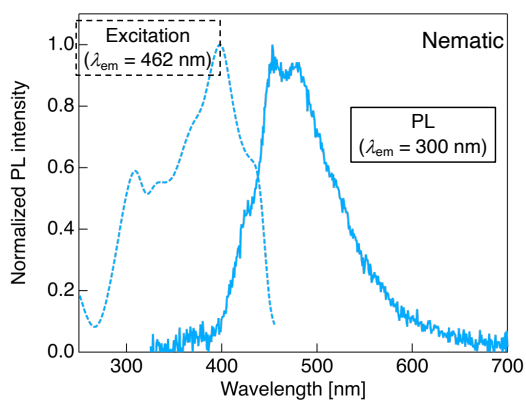

(b)

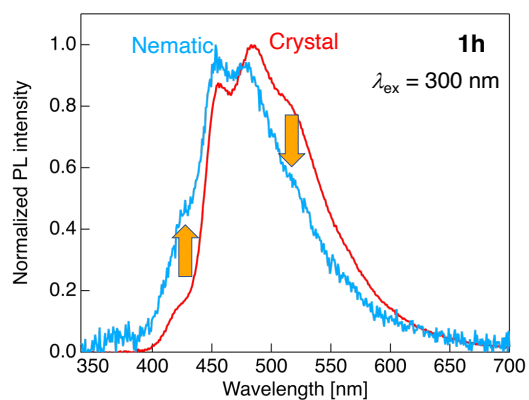

**Figure S31.** (a) Excitation and PL spectrum of **1h** in the aggregated structure of nematic phase. (b) Difference in PL spectrum between Cry and N phases.



## Quantum chemical calculation

Quantum chemical calculation was performed using the Gaussian 16 program set. The initial structure for quantum chemical calculations was optimized by the structural optimization calculation with the M06-2X functional and the 6-31+G(d,p) basis set. Theoretical vertical electronic transitions were determined by time-dependent self-consistent field (TD-SCF) approximation.

(a) Optimized structure

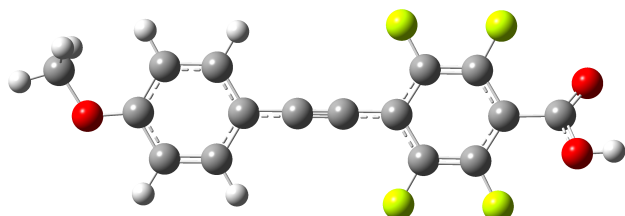

(b) HOMO-1 (-8.84 eV)

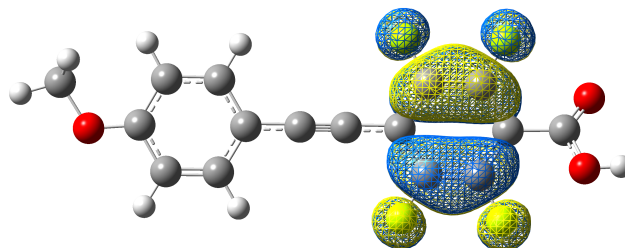

(c) HOMO (-7.45 eV)

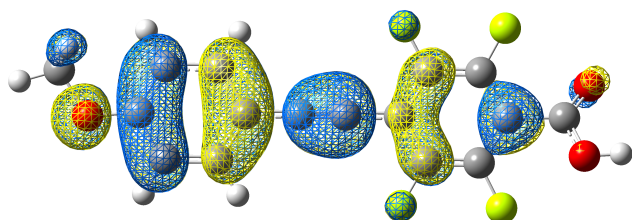

(d) LUMO (-1.75 eV)

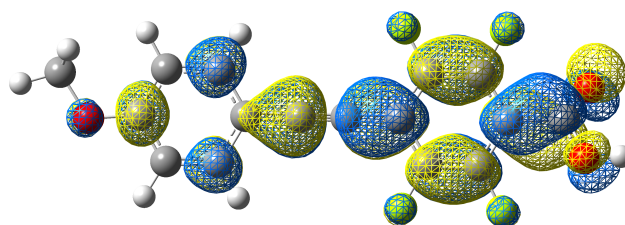

(e) Theoretical data

<Optimization>

SCF Done: E(RM062X) = -1239.07820687 Hartree A.U. after 10 cycles

Dipole moment (field-independent basis, Debye):

X= 4.6107 Y= 0.0184 Z= -1.0269 Tot= 4.7237

<TD-SCF>

|               |               |           |           |           |          |              |
|---------------|---------------|-----------|-----------|-----------|----------|--------------|
| Excited State | 1:            | Singlet-A | 3.8827 eV | 319.33 nm | f=1.3882 | <S**2>=0.000 |
|               | 79 → 83       | 0.11368   |           |           |          |              |
|               | 82(H) → 83(L) | 0.67893   |           |           |          |              |

This state for optimization and/or second-order correction.

Total Energy, E(TD-HF/TD-DFT) = -1238.93552070

Copying the excited state density for this state as the 1-particle RhoCI density.

|               |                 |           |           |           |          |              |
|---------------|-----------------|-----------|-----------|-----------|----------|--------------|
| Excited State | 2:              | Singlet-A | 4.6453 eV | 266.90 nm | f=0.0644 | <S**2>=0.000 |
|               | 79 → 87         | 0.14571   |           |           |          |              |
|               | 81(H-1) → 83(L) | 0.65560   |           |           |          |              |
|               | 82 → 87         | 0.16620   |           |           |          |              |

**Figure S32.** (a) Optimized structure of **1a** and its orbital distributions for (b) HOMO-1, (c) HOMO, and (d) LUMO. (e) Theoretical data calculated by optimization and TD-SCF calculation.

(a) Optimized structure

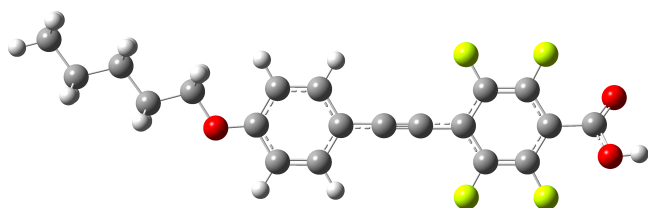

(b) HOMO-1 (-8.84 eV)

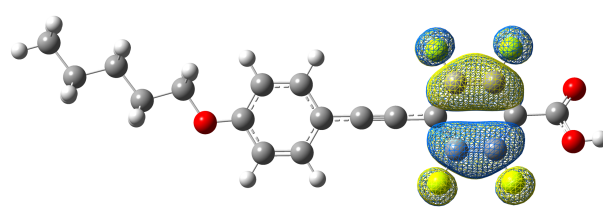

(c) HOMO (-7.44 eV)

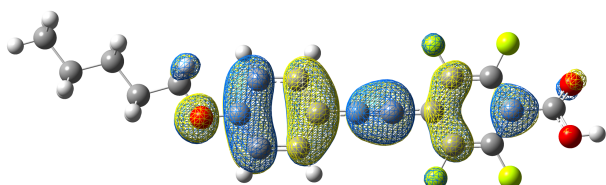

(d) LUMO (-1.75 eV)

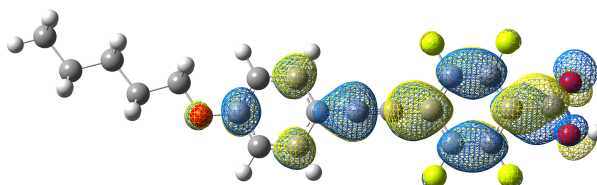

(e) Theoretical data

<Optimization>

SCF Done: E(RM062X) = -1396.26476274 Hartree A.U. after 11 cycles

Dipole moment (field-independent basis, Debye):

X= -5.0394 Y= -0.3780 Z= 0.9308 Tot= 5.1385

<TD-SCF>

|               |               |           |           |           |          |              |
|---------------|---------------|-----------|-----------|-----------|----------|--------------|
| Excited State | 1:            | Singlet-A | 3.7717 eV | 328.73 nm | f=1.5811 | <S**2>=0.000 |
|               | 95 → 99       | -0.12014  |           |           |          |              |
|               | 98(H) → 99(L) | 0.67727   |           |           |          |              |

This state for optimization and/or second-order correction.

Total Energy, E(TD-HF/TD-DFT) = -1396.12615684

Copying the excited state density for this state as the 1-particle RhoCI density.

|               |                 |           |           |           |          |              |
|---------------|-----------------|-----------|-----------|-----------|----------|--------------|
| Excited State | 2:              | Singlet-A | 4.6185 eV | 268.45 nm | f=0.0897 | <S**2>=0.000 |
|               | 95 → 103        | 0.13470   |           |           |          |              |
|               | 97(H-1) → 99(L) | 0.66107   |           |           |          |              |
|               | 98 → 103        | -0.15373  |           |           |          |              |

**Figure S33.** (a) Optimized structure of **1e** and its orbital distributions for (b) HOMO-1, (c) HOMO, and (d) LUMO. (e) Theoretical data calculated by optimization and TD-SCF calculation.

**Table S4.** Cartesian coordinate for **1a**.

| No. | Atom | Type | Coordinates (Angstroms) |           |           |    |   |   |           |           |           |
|-----|------|------|-------------------------|-----------|-----------|----|---|---|-----------|-----------|-----------|
|     | No.  |      | x                       | y         | z         |    |   |   |           |           |           |
| 1   | 8    | 0    | 7.119914                | -0.378629 | 0.015764  | 16 | 6 | 0 | -3.164992 | 1.235515  | -0.005529 |
| 2   | 6    | 0    | 5.775929                | -0.230893 | 0.008445  | 17 | 6 | 0 | -3.925545 | 0.063407  | 0.008872  |
| 3   | 6    | 0    | 5.121218                | 1.003920  | -0.068737 | 18 | 6 | 0 | -3.228813 | -1.147279 | 0.024796  |
| 4   | 1    | 0    | 5.676208                | 1.931716  | -0.129124 | 19 | 6 | 0 | -1.844563 | -1.181829 | 0.031048  |
| 5   | 6    | 0    | 3.730007                | 1.041741  | -0.068187 | 20 | 9 | 0 | -1.108028 | 2.349768  | -0.046825 |
| 6   | 1    | 0    | 3.220313                | 1.997825  | -0.127723 | 21 | 9 | 0 | -3.753003 | 2.430068  | -0.046816 |
| 7   | 6    | 0    | 2.978192                | -0.137572 | 0.007627  | 22 | 9 | 0 | -3.873721 | -2.313079 | 0.069227  |
| 8   | 6    | 0    | 3.649655                | -1.373275 | 0.084078  | 23 | 9 | 0 | -1.232809 | -2.366883 | 0.064482  |
| 9   | 1    | 0    | 3.075449                | -2.291986 | 0.143189  | 24 | 6 | 0 | -5.417349 | 0.146047  | 0.034096  |
| 10  | 6    | 0    | 5.031173                | -1.418495 | 0.084775  | 25 | 8 | 0 | -5.994684 | -0.876323 | -0.598847 |
| 11  | 1    | 0    | 5.561379                | -2.362943 | 0.143874  | 26 | 8 | 0 | -6.028067 | 1.044897  | 0.560405  |
| 12  | 6    | 0    | 1.551074                | -0.089010 | 0.007713  | 27 | 1 | 0 | -6.958948 | -0.772991 | -0.532548 |
| 13  | 6    | 0    | 0.338712                | -0.050904 | 0.008275  | 28 | 6 | 0 | 7.922526  | 0.792457  | -0.059149 |
| 14  | 6    | 0    | -1.080599               | -0.011156 | 0.008293  | 29 | 1 | 0 | 8.954696  | 0.448067  | -0.037302 |
| 15  | 6    | 0    | -1.781305               | 1.198748  | -0.013885 | 30 | 1 | 0 | 7.734698  | 1.334591  | -0.991283 |
|     |      |      |                         |           |           | 31 | 1 | 0 | 7.735042  | 1.448763  | 0.796563  |

**Table S5.** Cartesian coordinate for **1e**.

| No. | Atom |      | Coordinates (Angstroms) |           |           | No. | Atom |      | Coordinates (Angstroms) |           |           |
|-----|------|------|-------------------------|-----------|-----------|-----|------|------|-------------------------|-----------|-----------|
|     | No.  | Type | x                       | y         | z         |     | No.  | Type | x                       | y         | z         |
| 1   | 8    | 0    | -5.233268               | -0.983555 | -0.008581 | 22  | 9    | 0    | 5.890712                | -2.116862 | -0.092038 |
| 2   | 6    | 0    | -3.902604               | -0.745975 | -0.008320 | 23  | 9    | 0    | 3.261753                | -2.381238 | -0.089416 |
| 3   | 6    | 0    | -3.331962               | 0.532708  | 0.004708  | 24  | 6    | 0    | 7.233299                | 0.455578  | -0.029042 |
| 4   | 1    | 0    | -3.948396               | 1.422687  | 0.015511  | 25  | 8    | 0    | 7.888700                | -0.520543 | 0.600679  |
| 5   | 6    | 0    | -1.946680               | 0.664341  | 0.003831  | 26  | 8    | 0    | 7.772067                | 1.402214  | -0.550215 |
| 6   | 1    | 0    | -1.502746               | 1.654443  | 0.013921  | 27  | 1    | 0    | 8.841756                | -0.340782 | 0.536138  |
| 7   | 6    | 0    | -1.116417               | -0.463791 | -0.009976 | 28  | 6    | 0    | -6.124062               | 0.132049  | 0.005280  |
| 8   | 6    | 0    | -1.702733               | -1.744165 | -0.023071 | 29  | 1    | 0    | -5.938293               | 0.736128  | 0.903137  |
| 9   | 1    | 0    | -1.067721               | -2.623880 | -0.033705 | 30  | 1    | 0    | -5.941128               | 0.755990  | -0.879490 |
| 10  | 6    | 0    | -3.078150               | -1.882536 | -0.022219 | 31  | 6    | 0    | -7.541874               | -0.403214 | 0.001478  |
| 11  | 1    | 0    | -3.542977               | -2.862578 | -0.032097 | 32  | 1    | 0    | -7.683306               | -1.028491 | -0.888146 |
| 12  | 6    | 0    | 0.303959                | -0.317835 | -0.010398 | 33  | 1    | 0    | -7.681200               | -1.047095 | 0.878068  |
| 13  | 6    | 0    | 1.510726                | -0.194876 | -0.010593 | 34  | 6    | 0    | -8.571119               | 0.725976  | 0.014566  |
| 14  | 6    | 0    | 2.922726                | -0.045697 | -0.009669 | 35  | 1    | 0    | -8.417268               | 1.373825  | -0.859242 |
| 15  | 6    | 0    | 3.524969                | 1.215884  | 0.024526  | 36  | 1    | 0    | -8.415469               | 1.355217  | 0.901547  |
| 16  | 6    | 0    | 4.901259                | 1.362937  | 0.018146  | 37  | 6    | 0    | -10.009892              | 0.211462  | 0.010578  |
| 17  | 6    | 0    | 5.752622                | 0.255129  | -0.006810 | 38  | 1    | 0    | -10.163943              | -0.417849 | -0.874986 |
| 18  | 6    | 0    | 5.154552                | -1.006935 | -0.035423 | 39  | 1    | 0    | -10.162434              | -0.435915 | 0.883293  |
| 19  | 6    | 0    | 3.777374                | -1.151703 | -0.043126 | 40  | 6    | 0    | -11.034755              | 1.343638  | 0.023096  |
| 20  | 9    | 0    | 2.762230                | 2.309320  | 0.068483  | 41  | 1    | 0    | -10.914713              | 1.986918  | -0.854947 |
| 21  | 9    | 0    | 5.392150                | 2.600109  | 0.072594  | 42  | 1    | 0    | -12.057953              | 0.957893  | 0.020008  |
|     |      |      |                         |           |           | 43  | 1    | 0    | -10.913225              | 1.968767  | 0.913952  |
